# Supplementary material
Source: ML conference proceedings conference paper supplement (https://openreview.net/forum?id=yJiMANMsz2)

Class 0

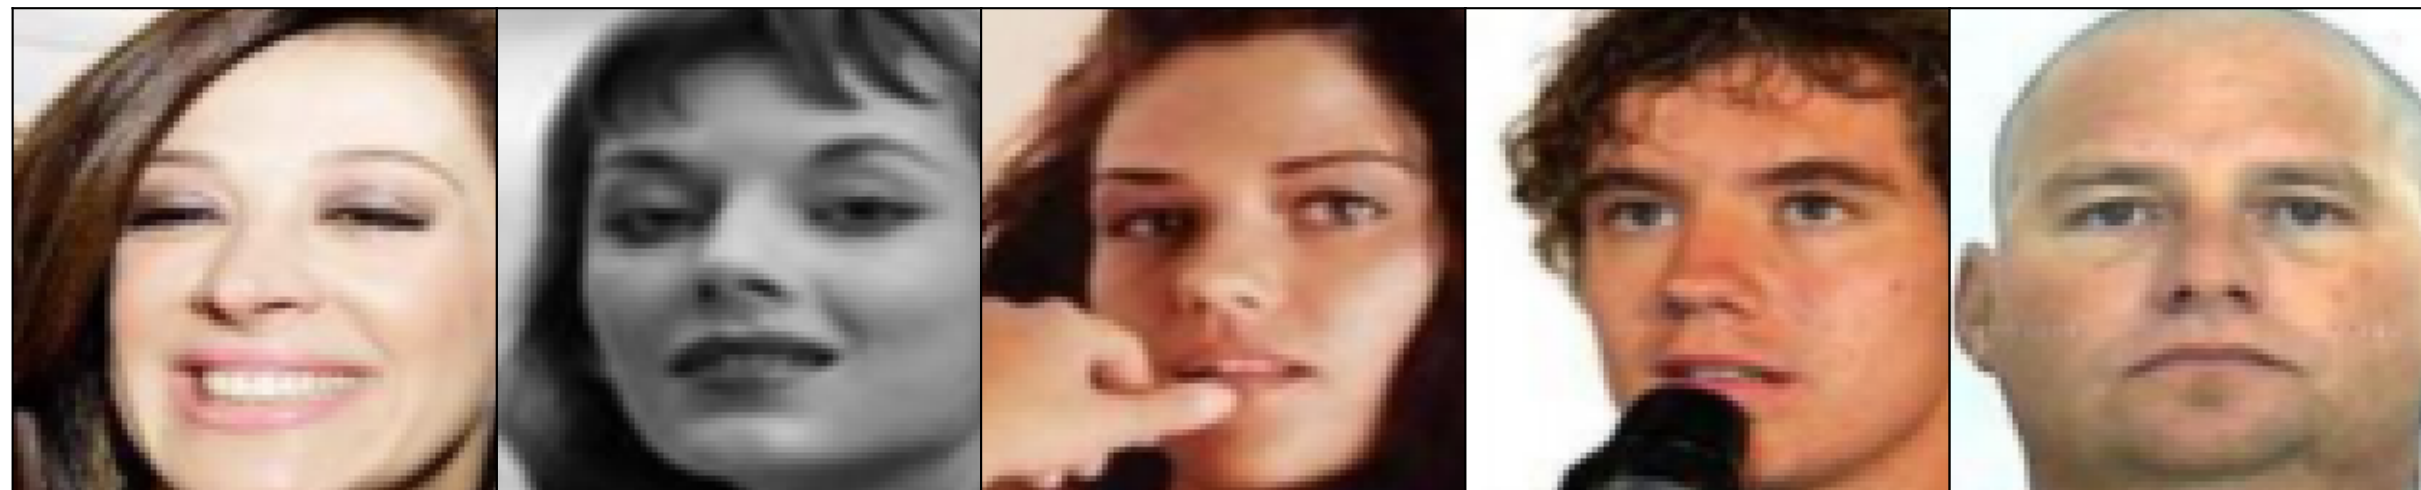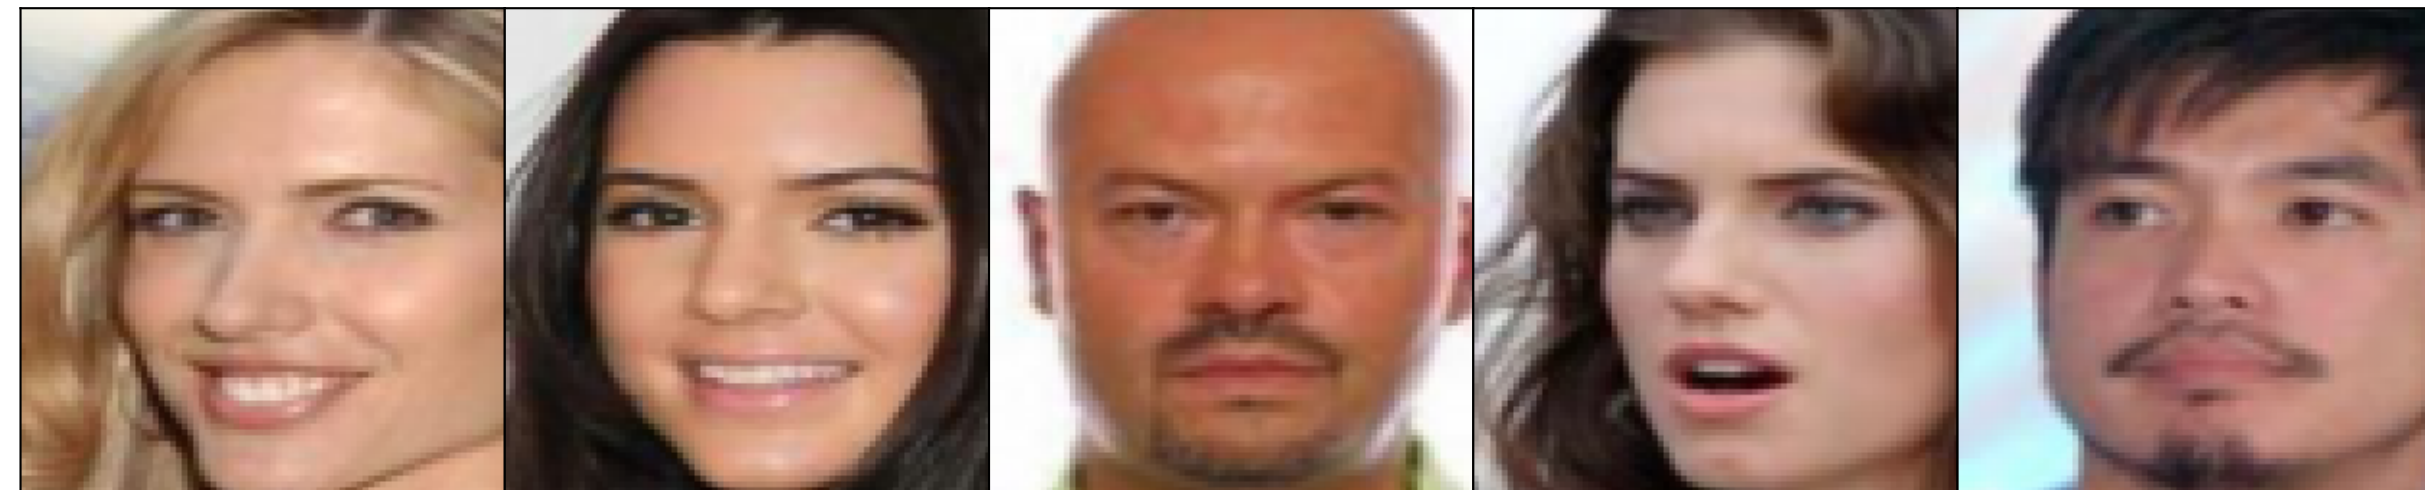

Class 1

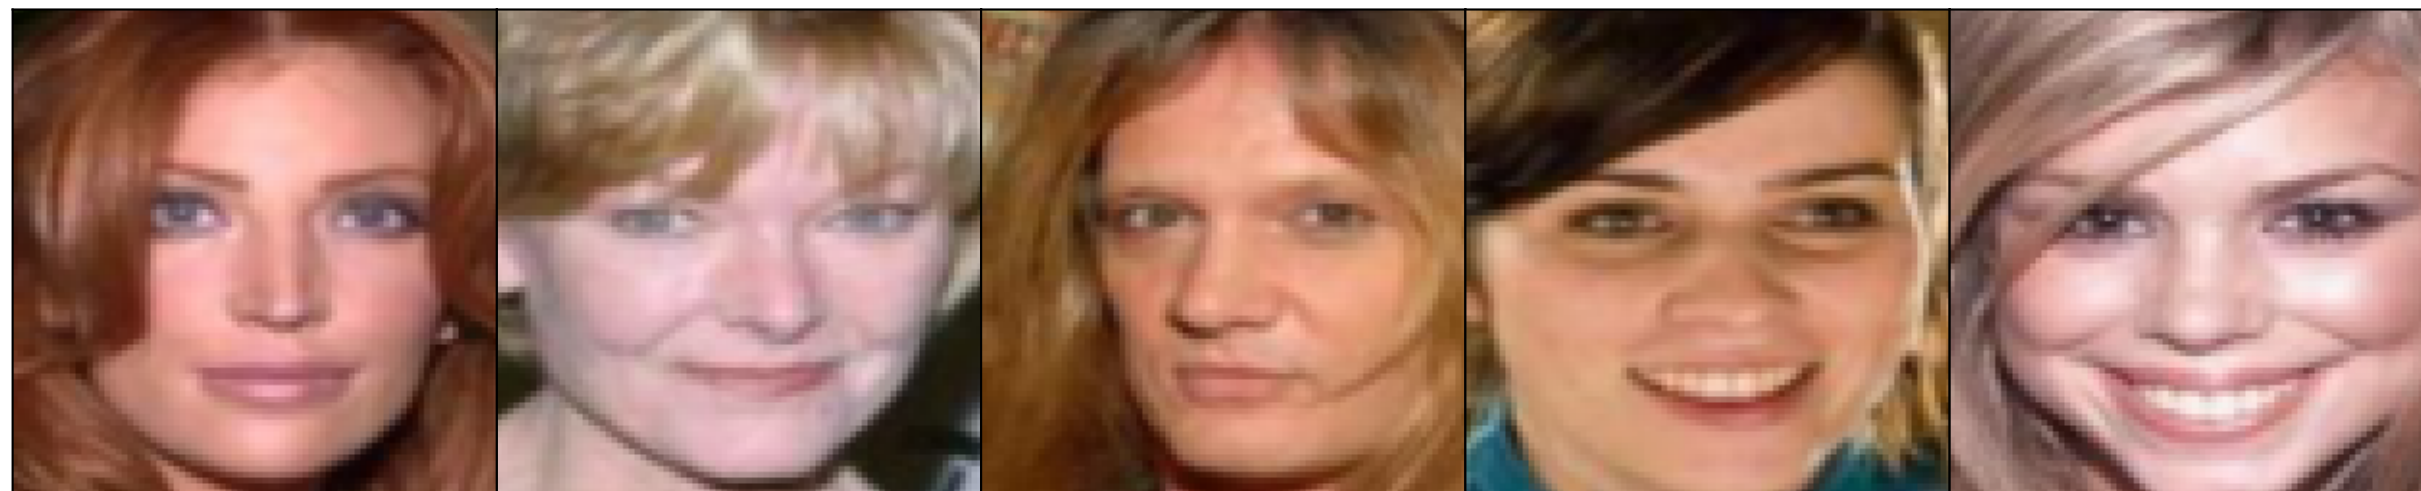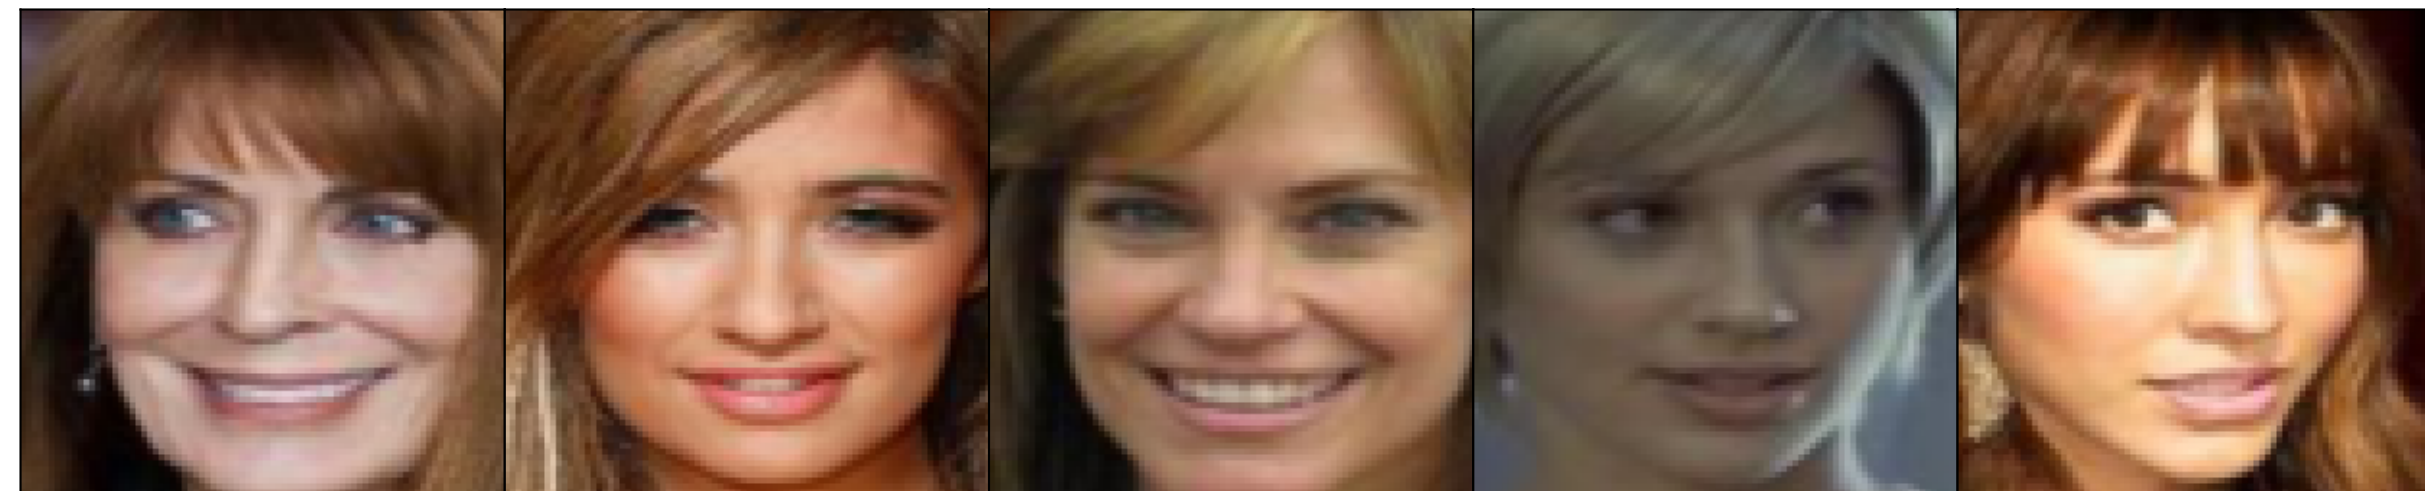

Support Samples

Query Samples

Supplement: supplementary_material [file celeba_lsd_background.pdf › DRESS_ICLR_Supplementary/DRESS_implementation_code/visualization_results/celeba_lsd_background.pdf]

Class 0

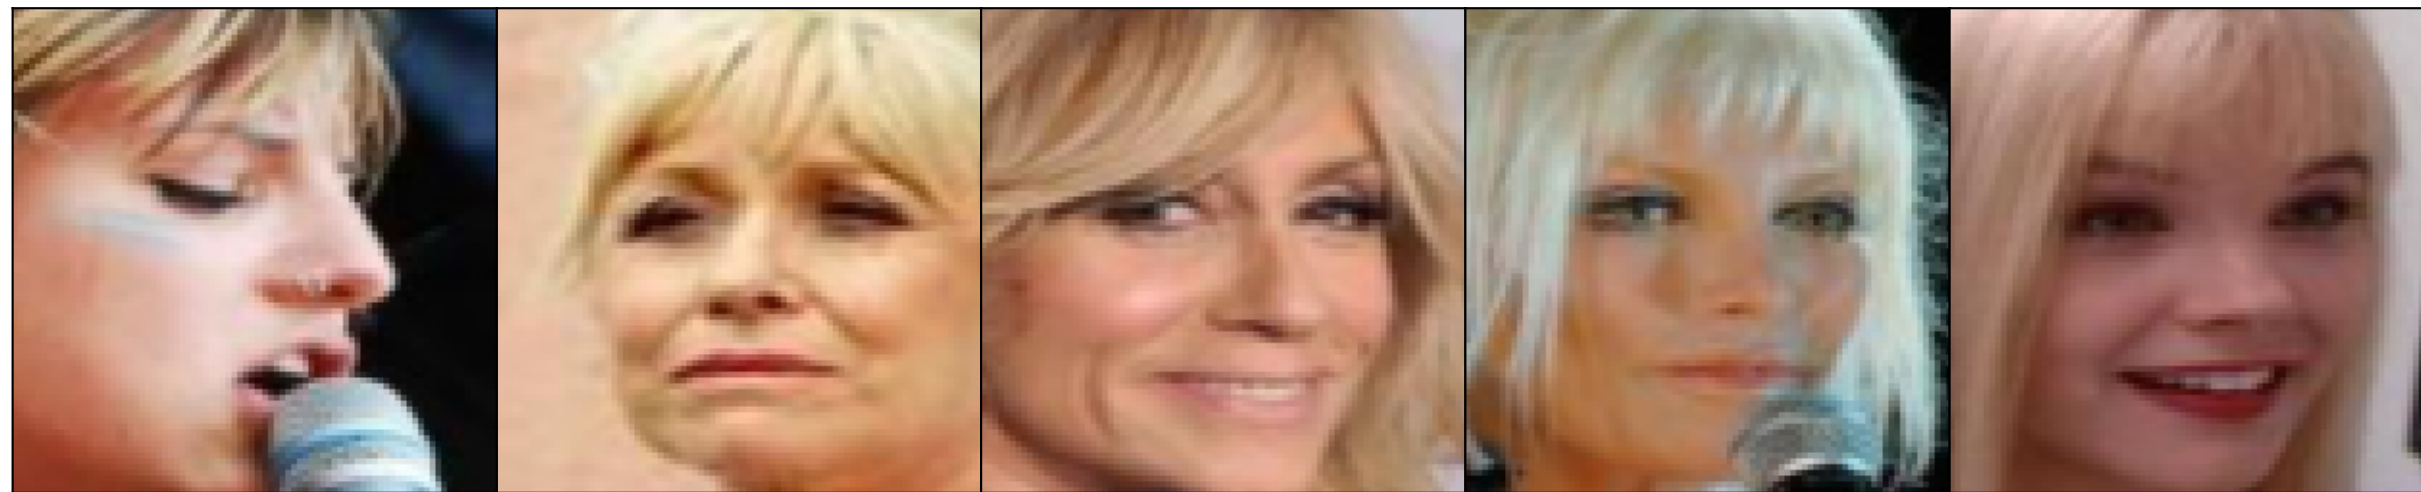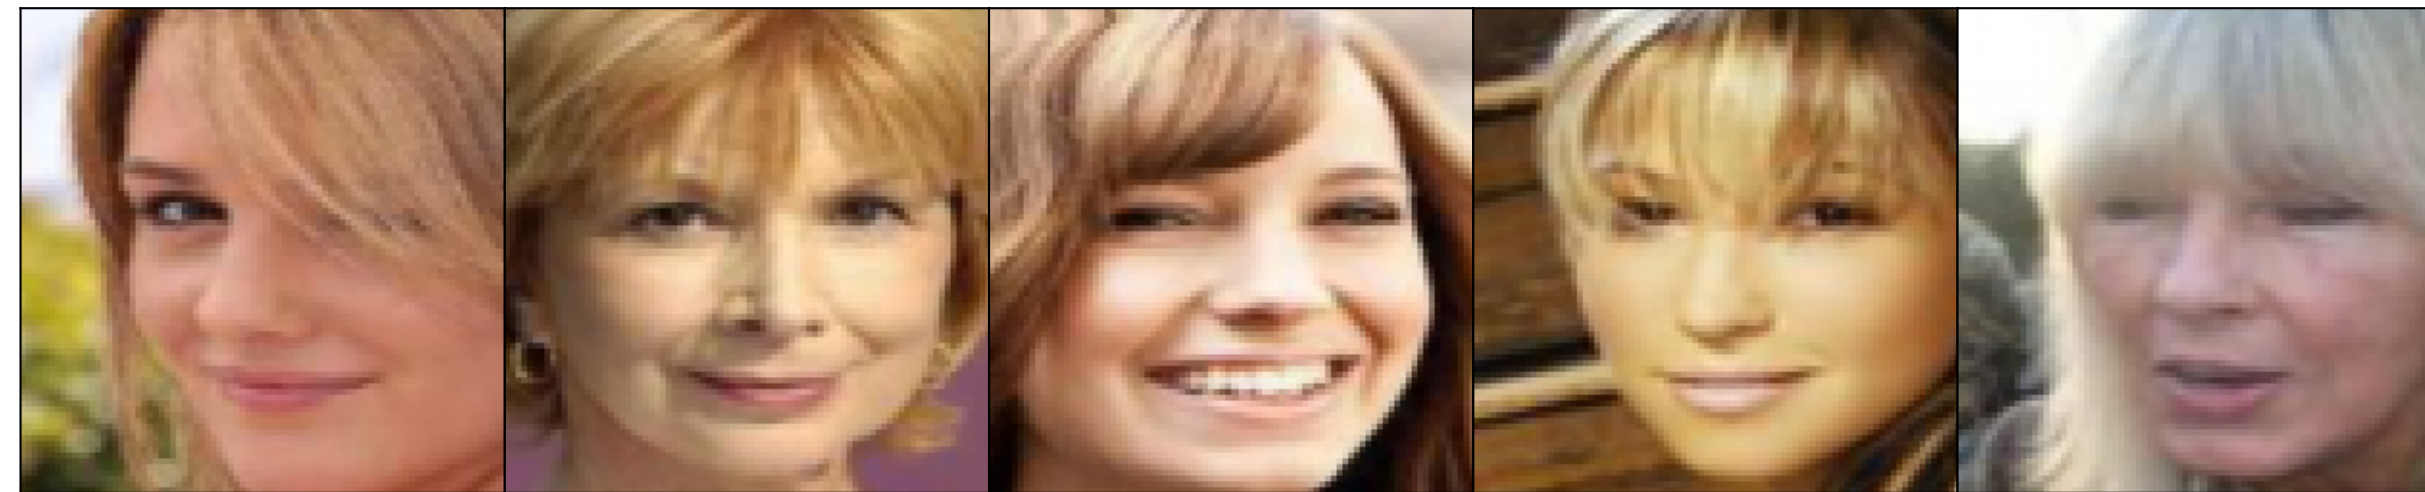

Class 1

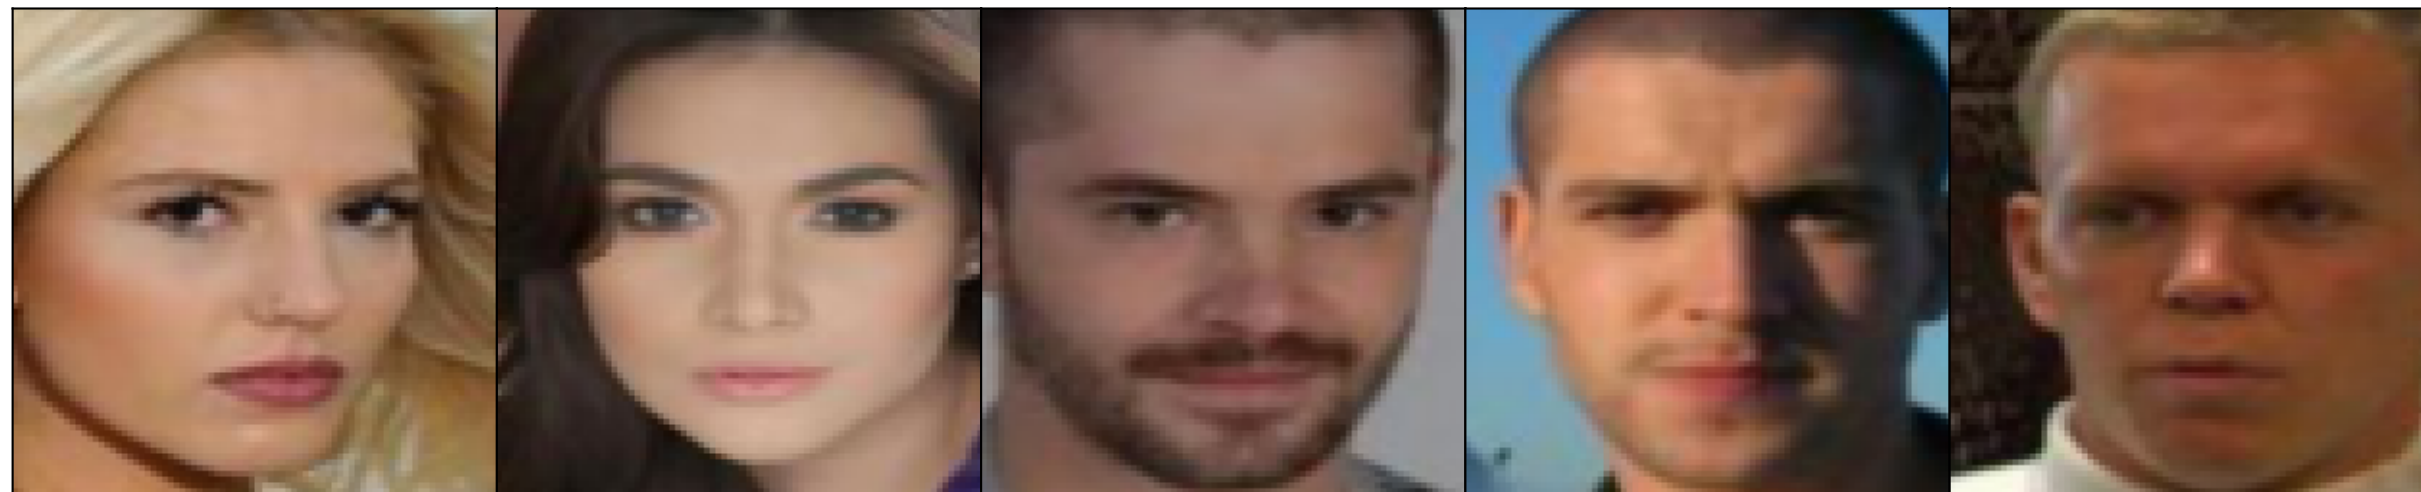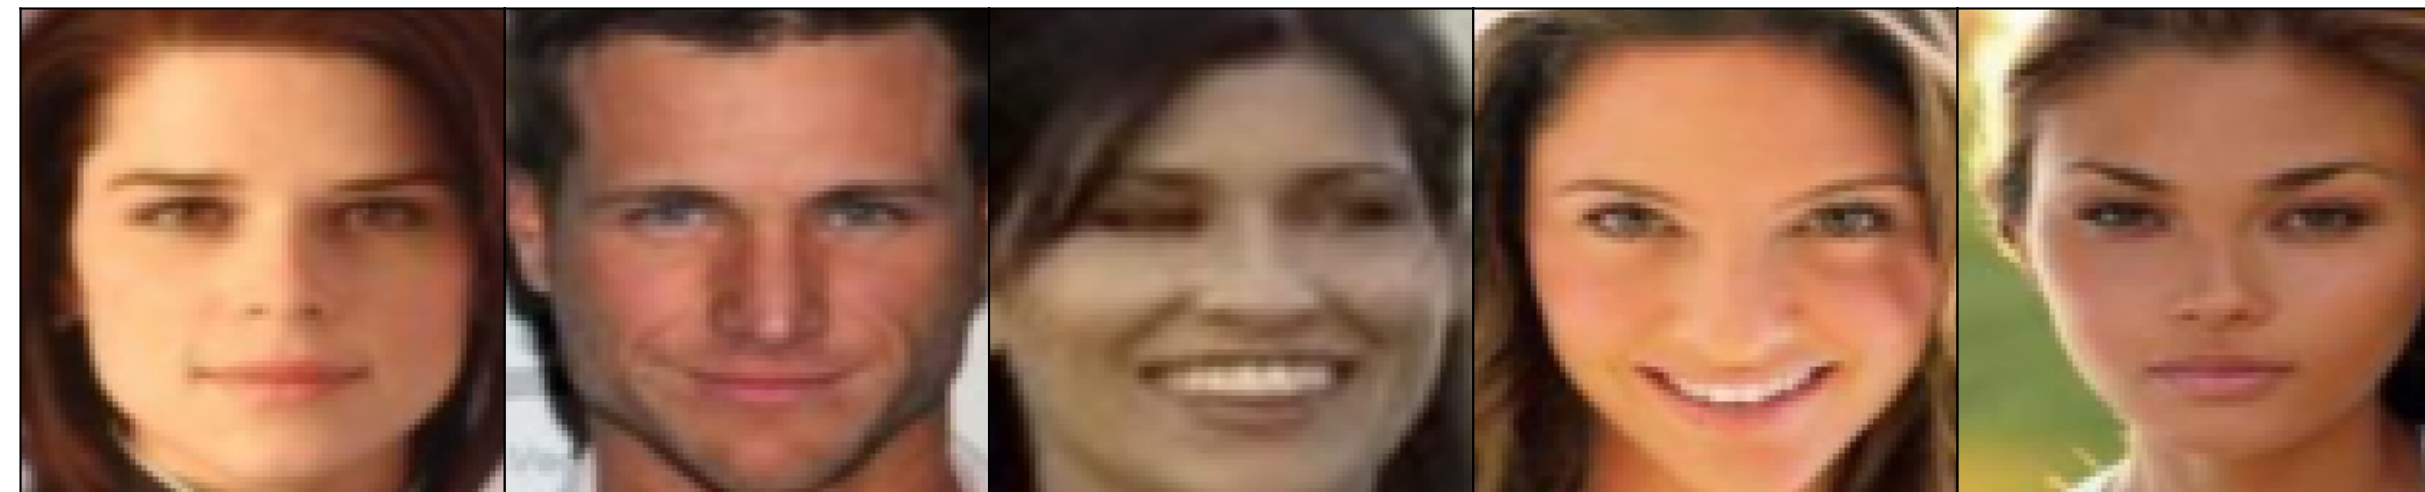

Support Samples

Query Samples

Supplement: supplementary_material [file celeba_lsd_bangs.pdf › DRESS_ICLR_Supplementary/DRESS_implementation_code/visualization_results/celeba_lsd_bangs.pdf]

Class 0

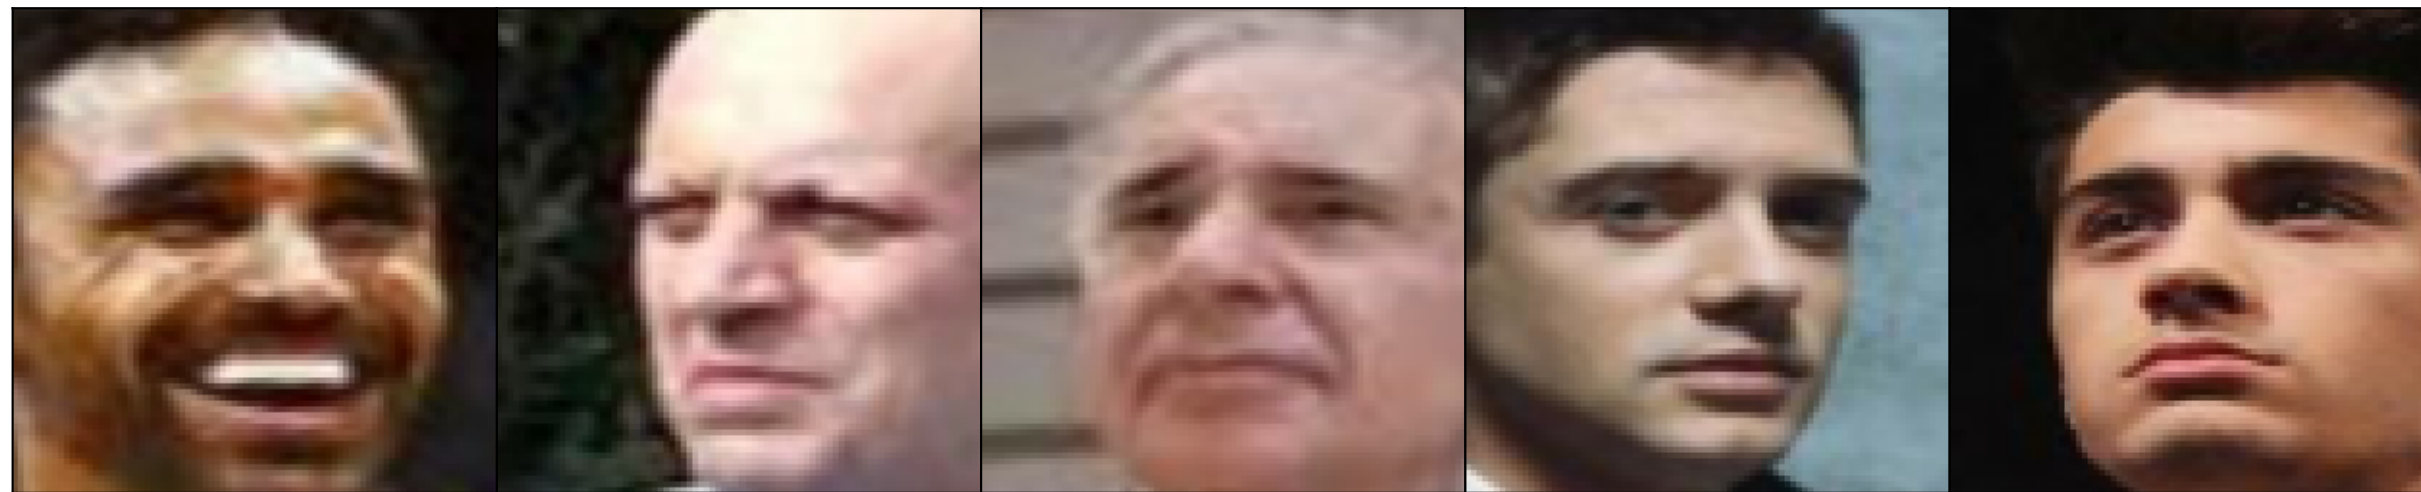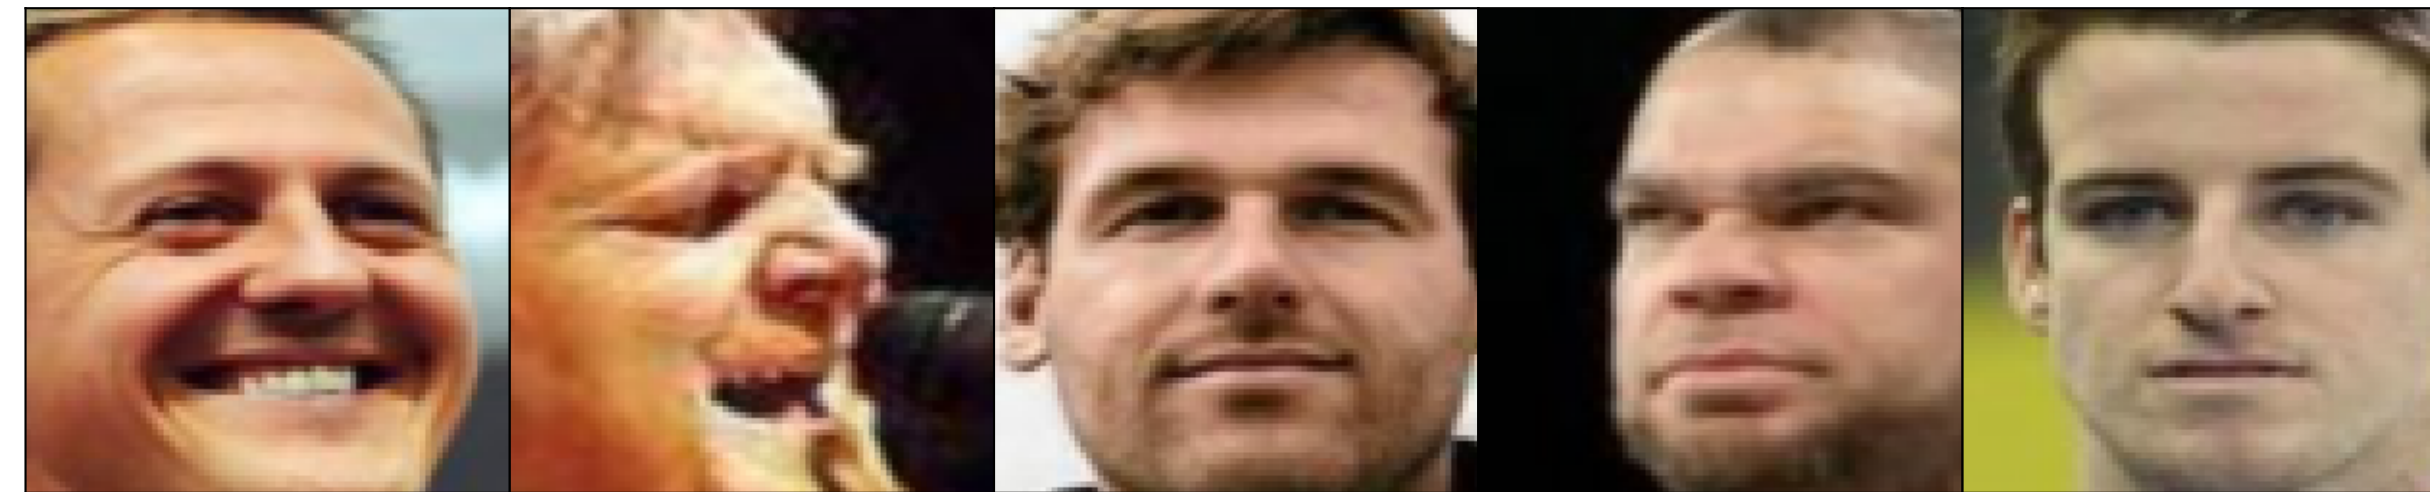

Class 1

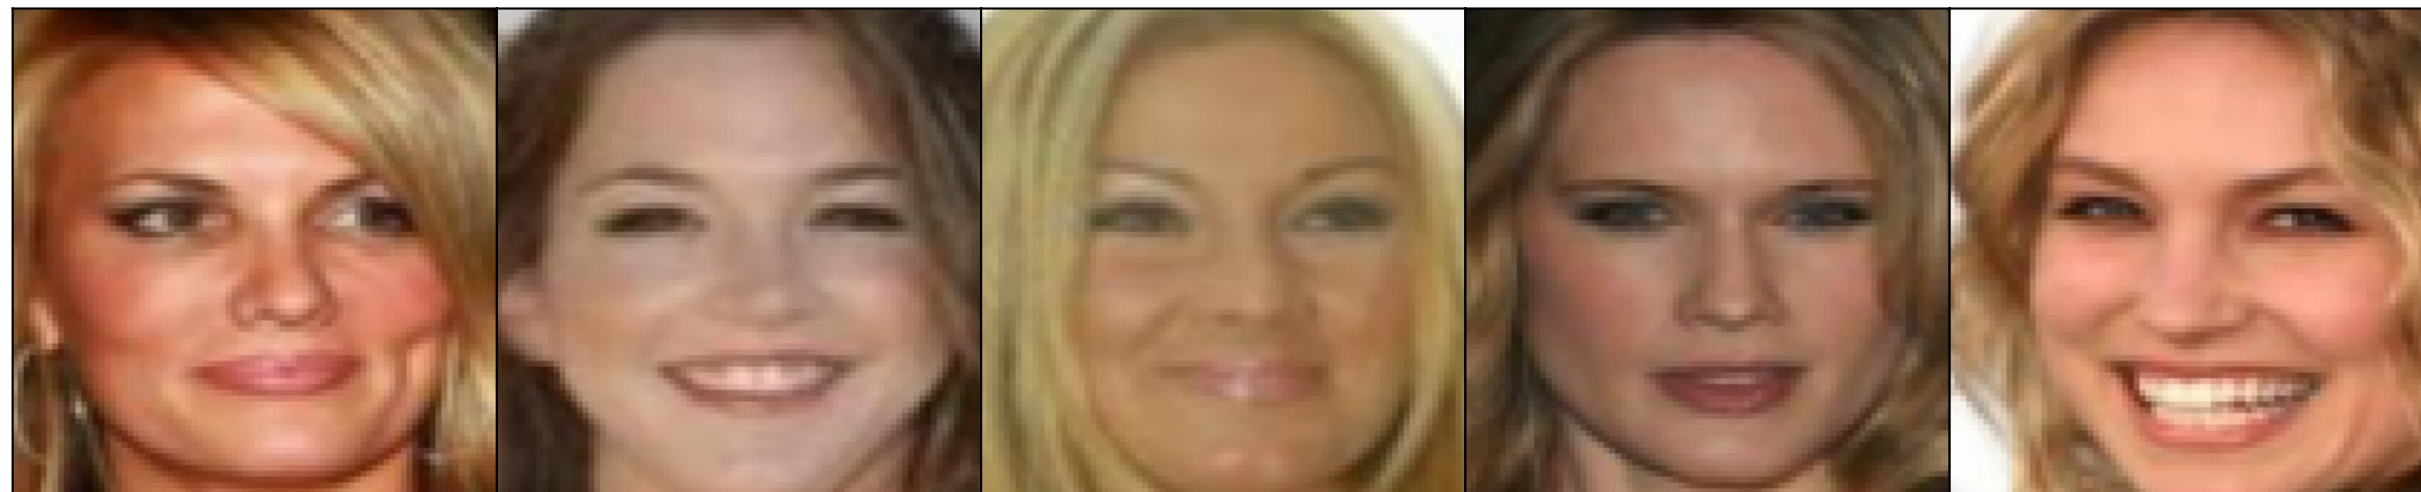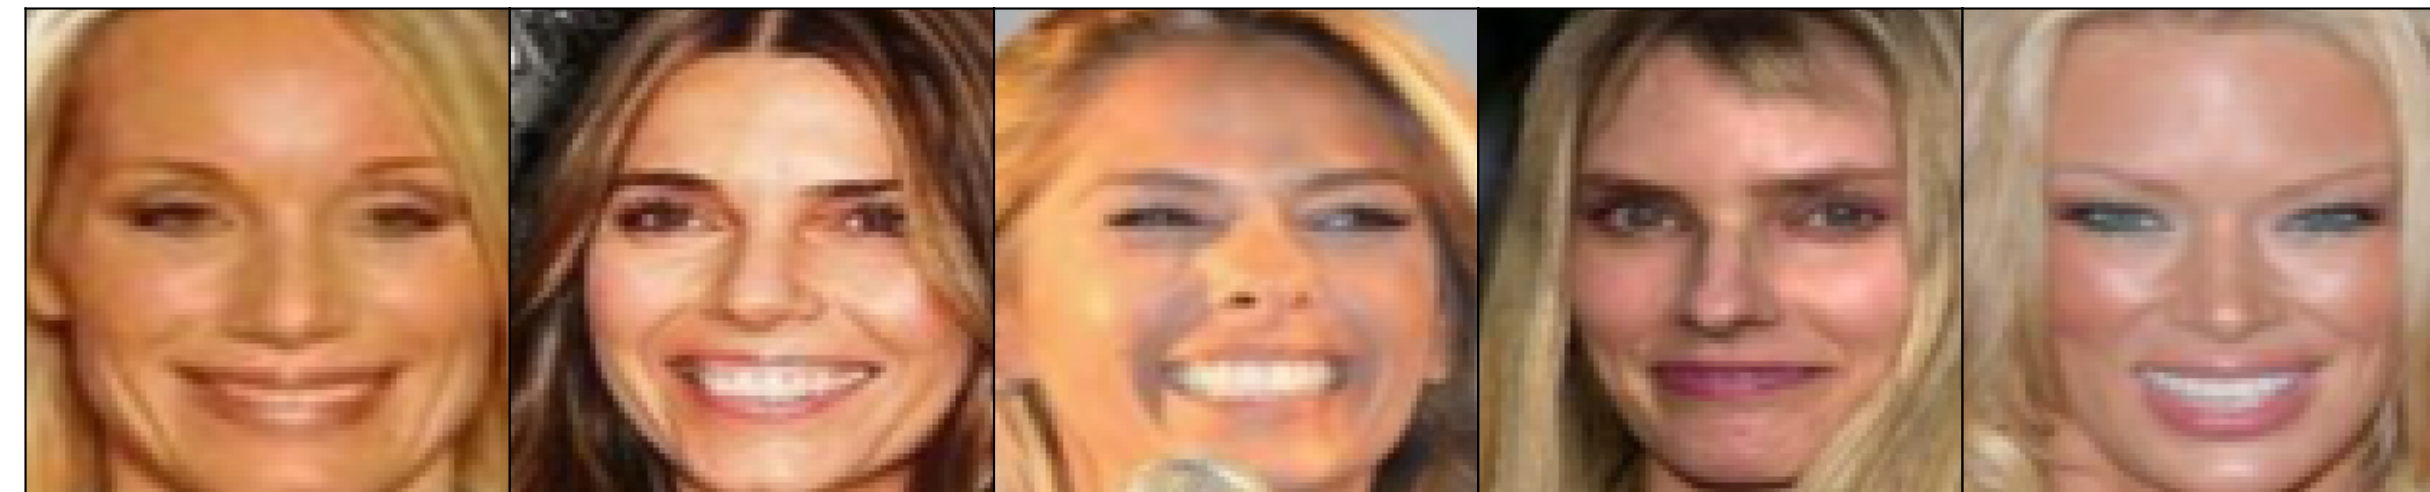

Support Samples

Query Samples

Supplement: supplementary_material [file celeba_lsd_gender.pdf › DRESS_ICLR_Supplementary/DRESS_implementation_code/visualization_results/celeba_lsd_gender.pdf]

Class 0

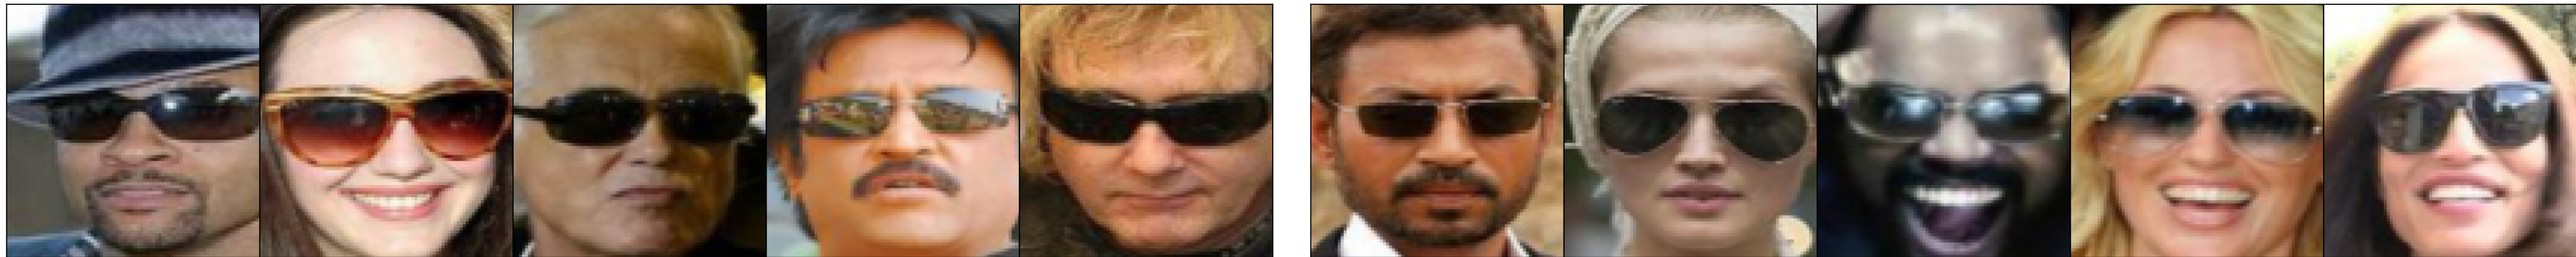

Class 1

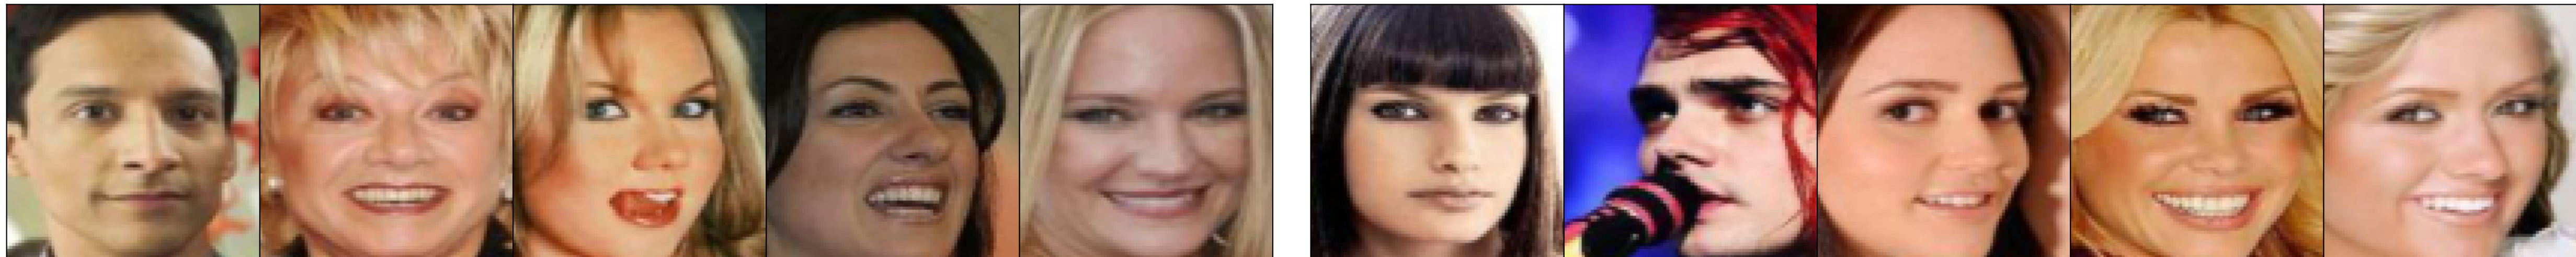

Support Samples

Query Samples

Supplement: supplementary_material [file celeba_lsd_glasses.pdf › DRESS_ICLR_Supplementary/DRESS_implementation_code/visualization_results/celeba_lsd_glasses.pdf]

Class 0

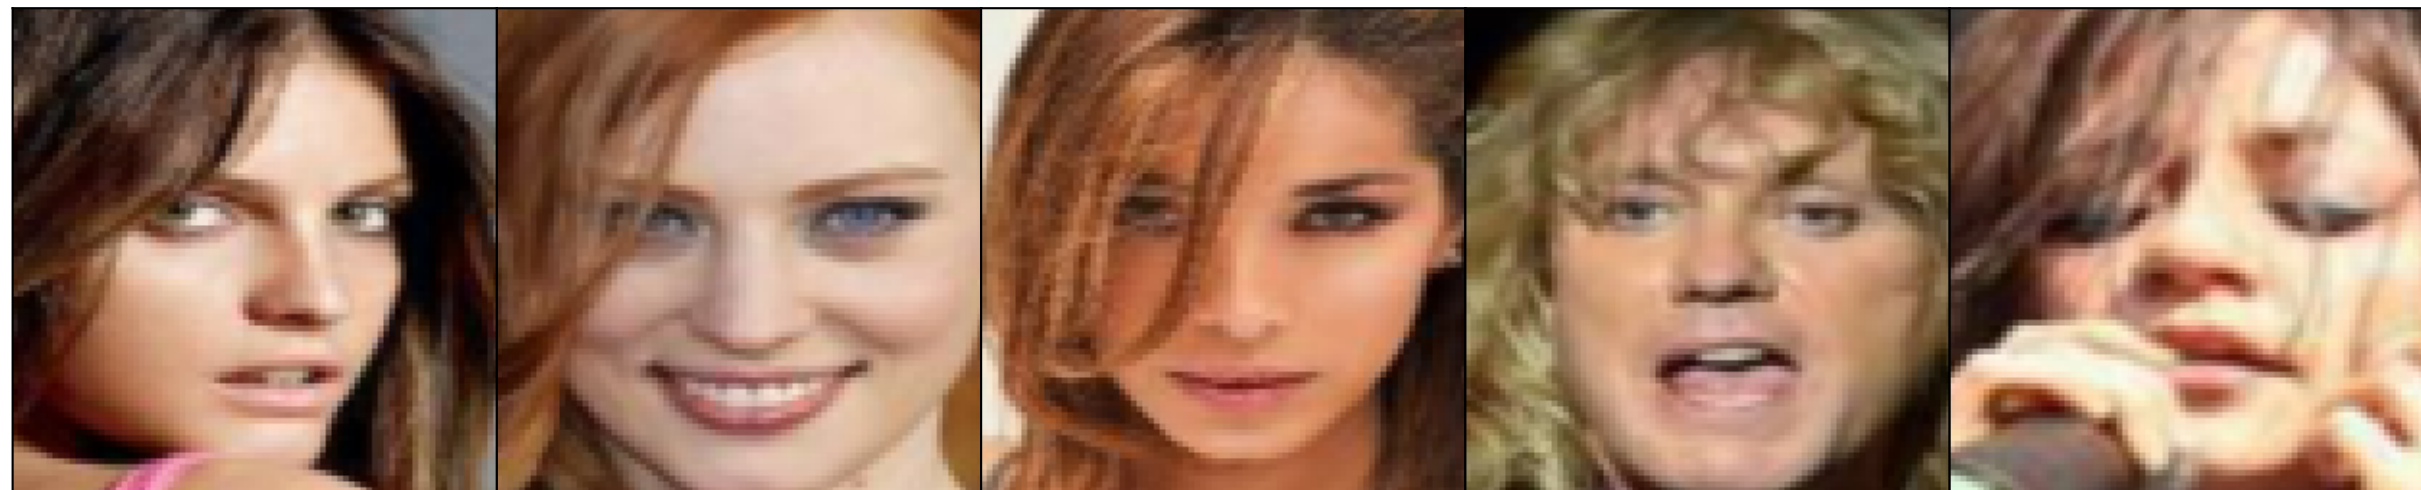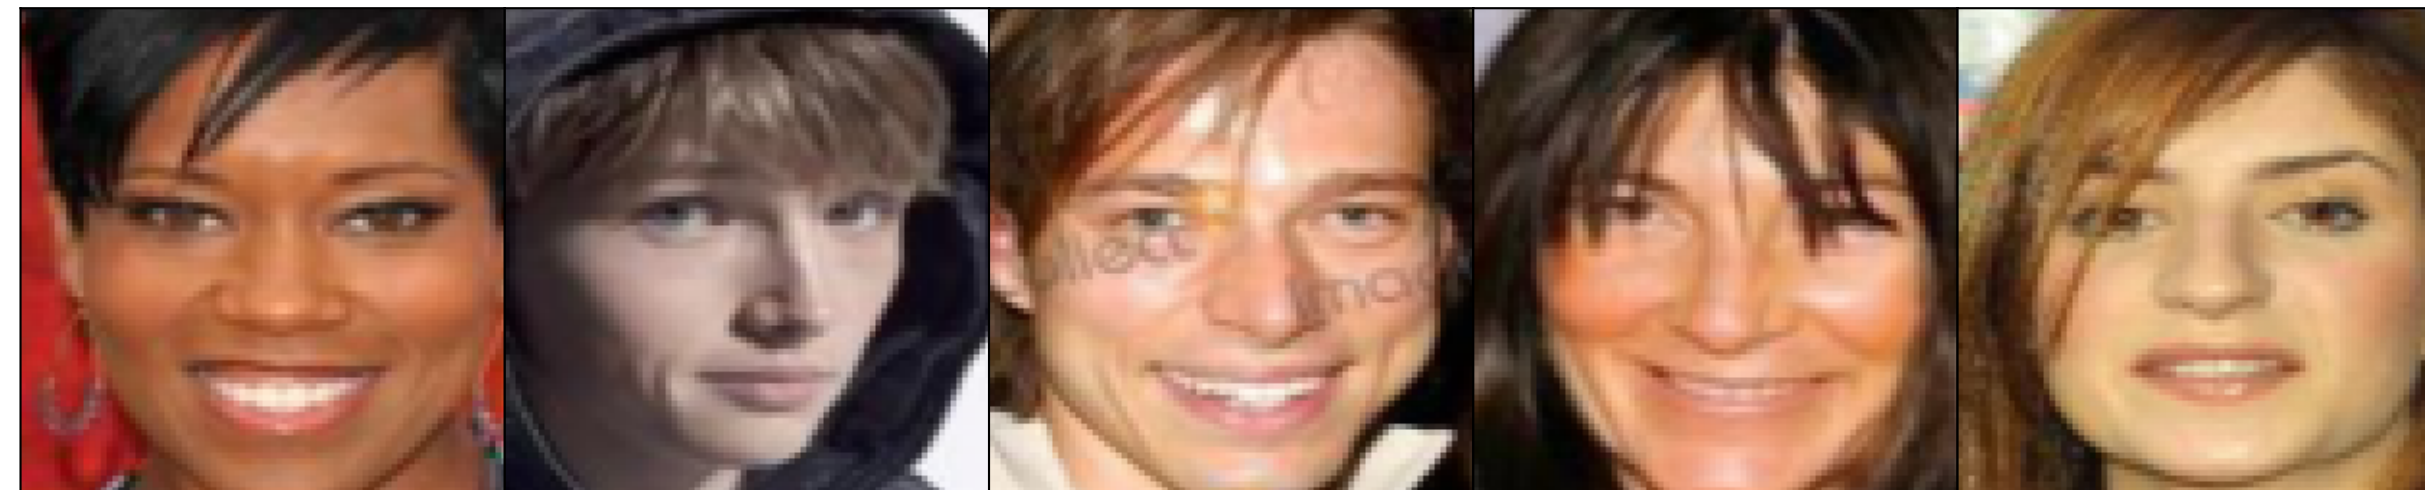

Class 1

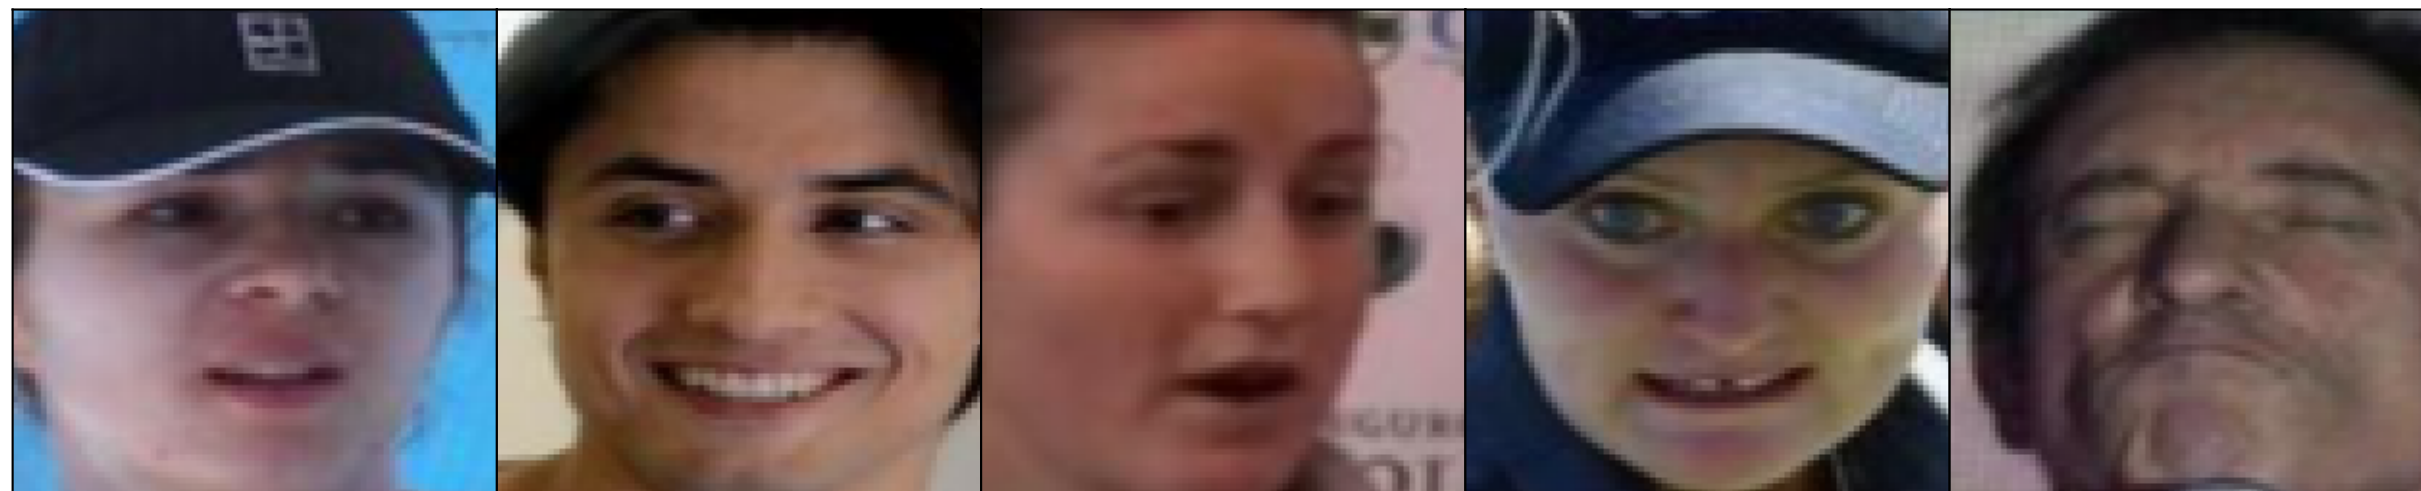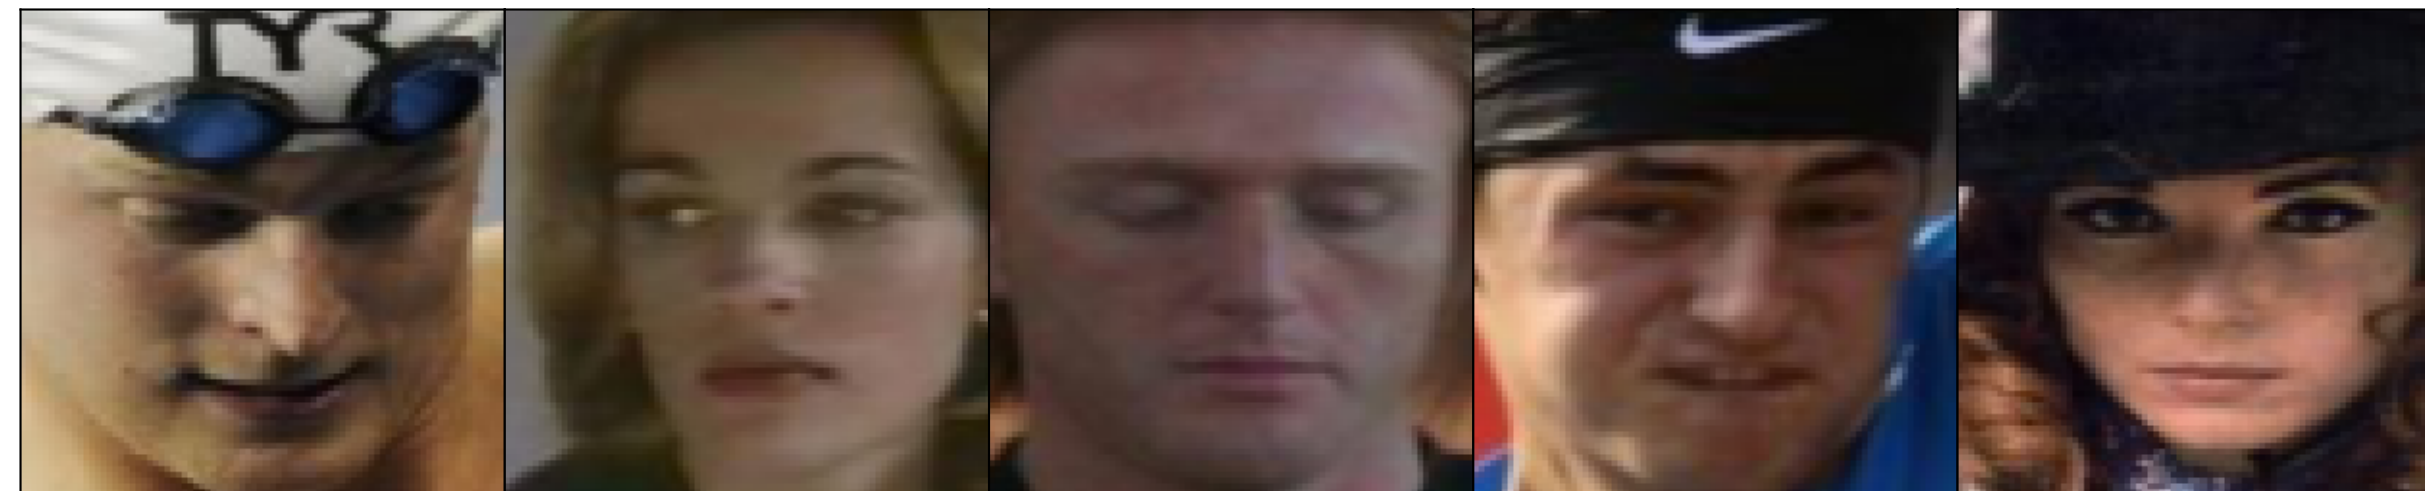

Support Samples

Query Samples

Supplement: supplementary_material [file celeba_lsd_lighting.pdf › DRESS_ICLR_Supplementary/DRESS_implementation_code/visualization_results/celeba_lsd_lighting.pdf]

Class 0

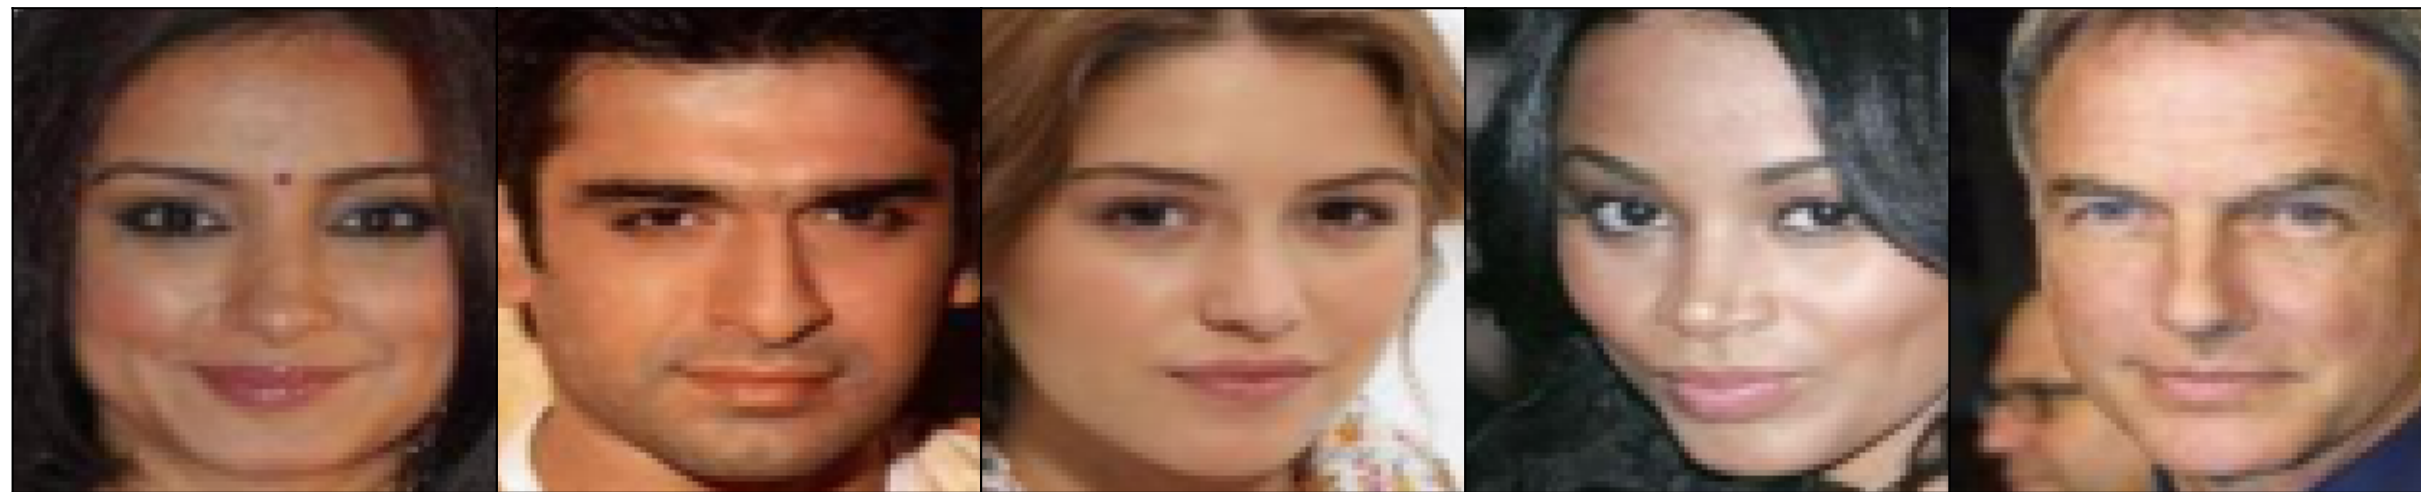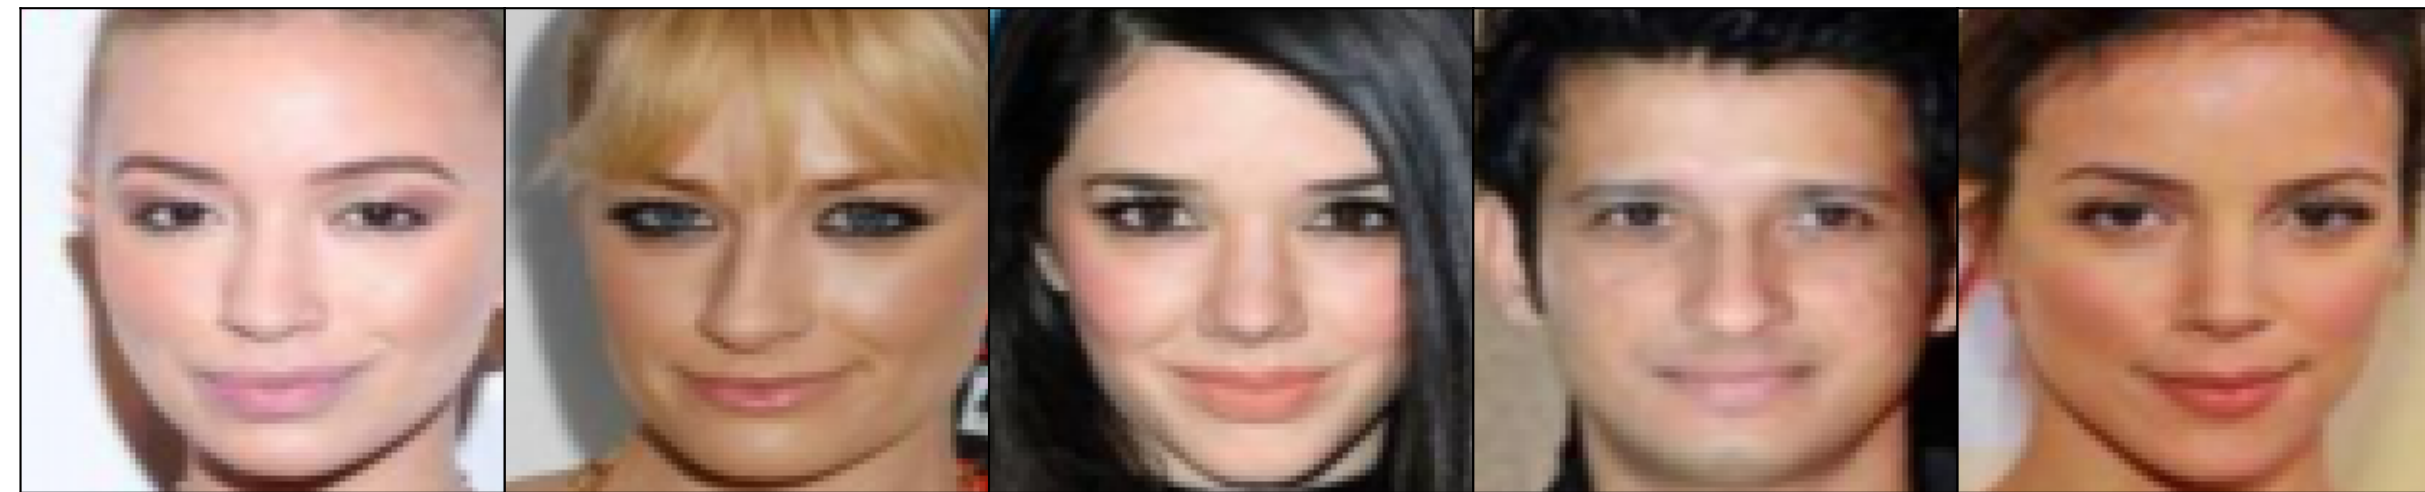

Class 1

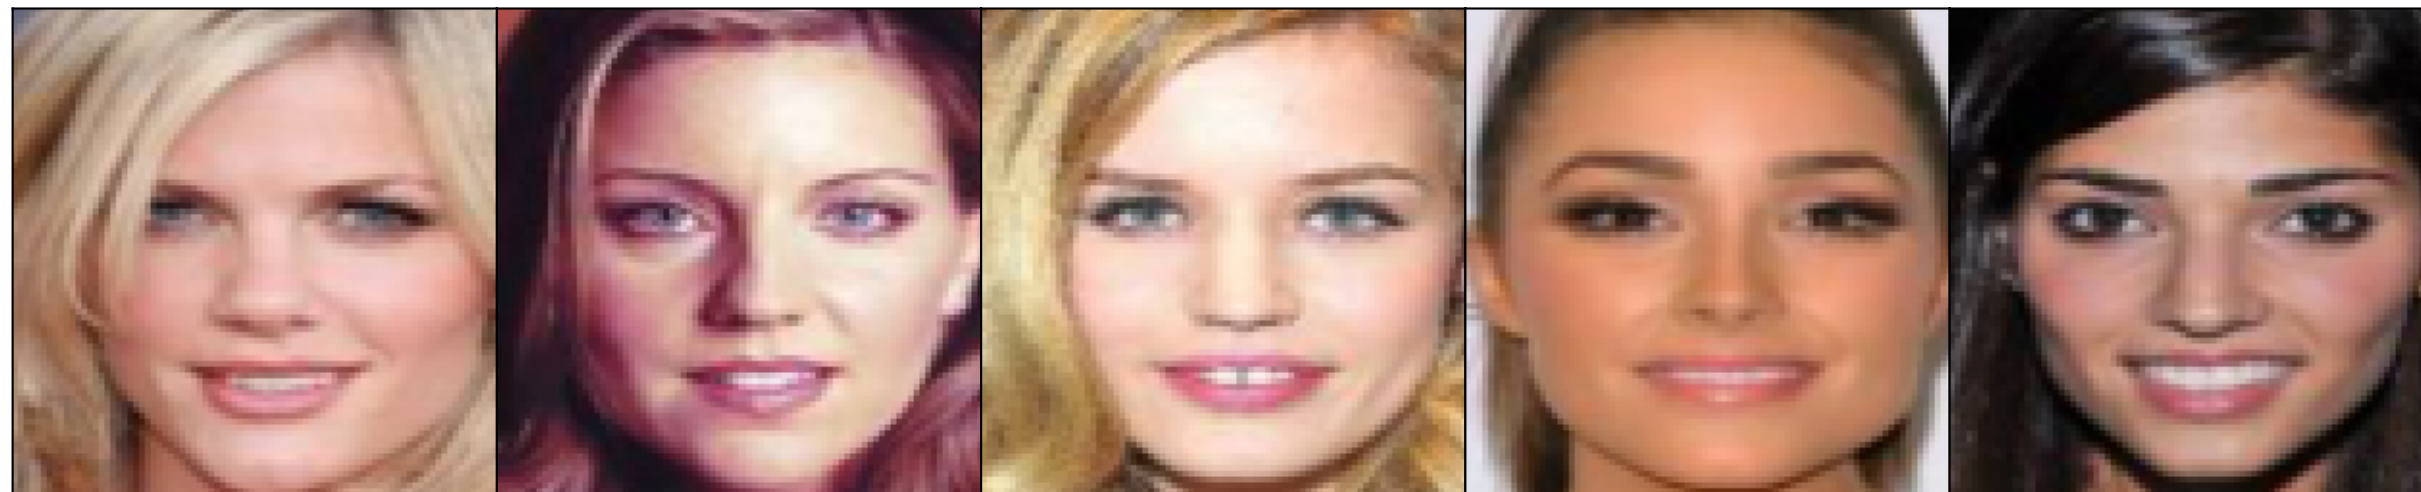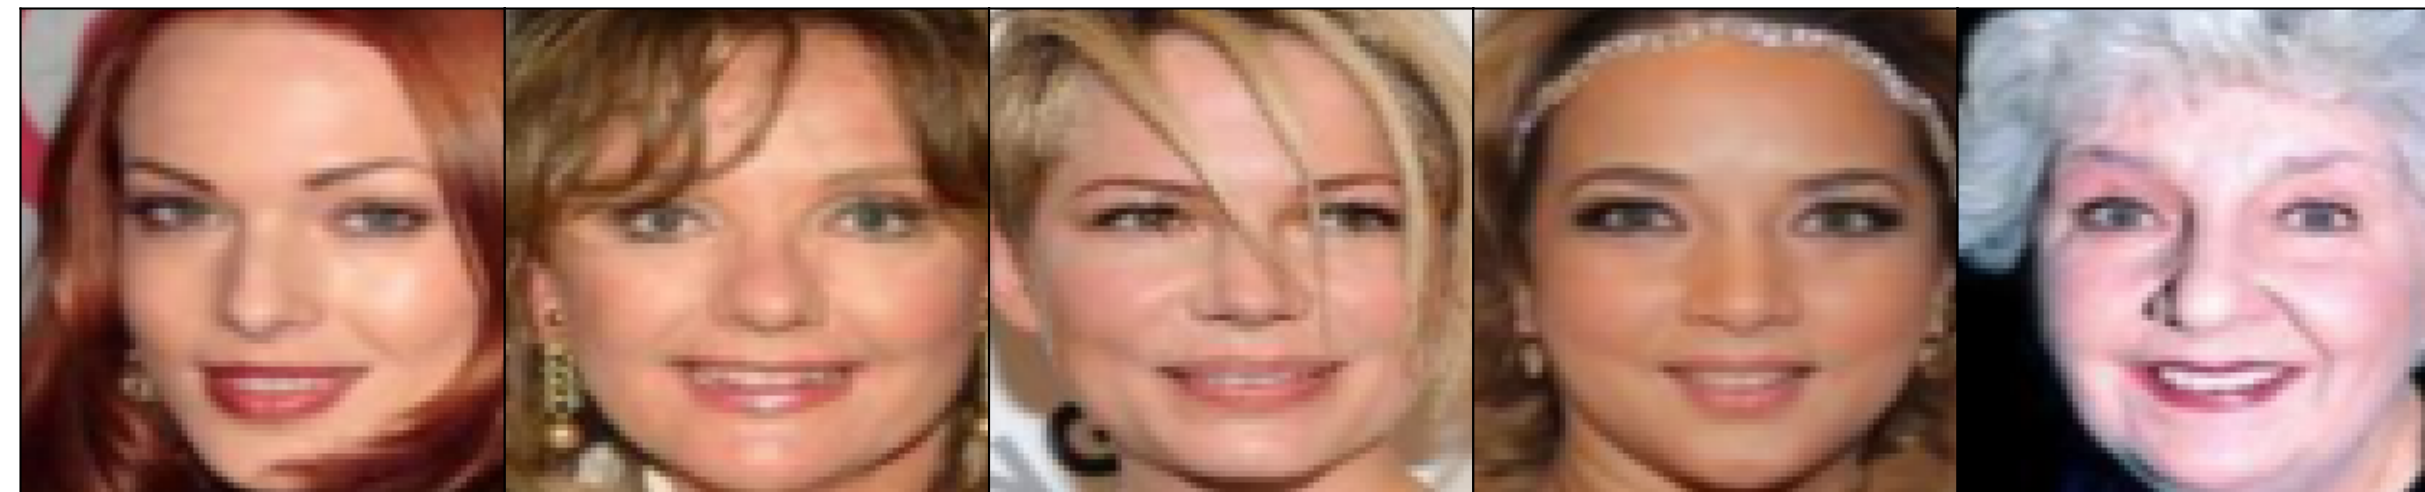

Support Samples

Query Samples

Supplement: supplementary_material [file celeba_lsd_mouthopen.pdf › DRESS_ICLR_Supplementary/DRESS_implementation_code/visualization_results/celeba_lsd_mouthopen.pdf]

Class 0

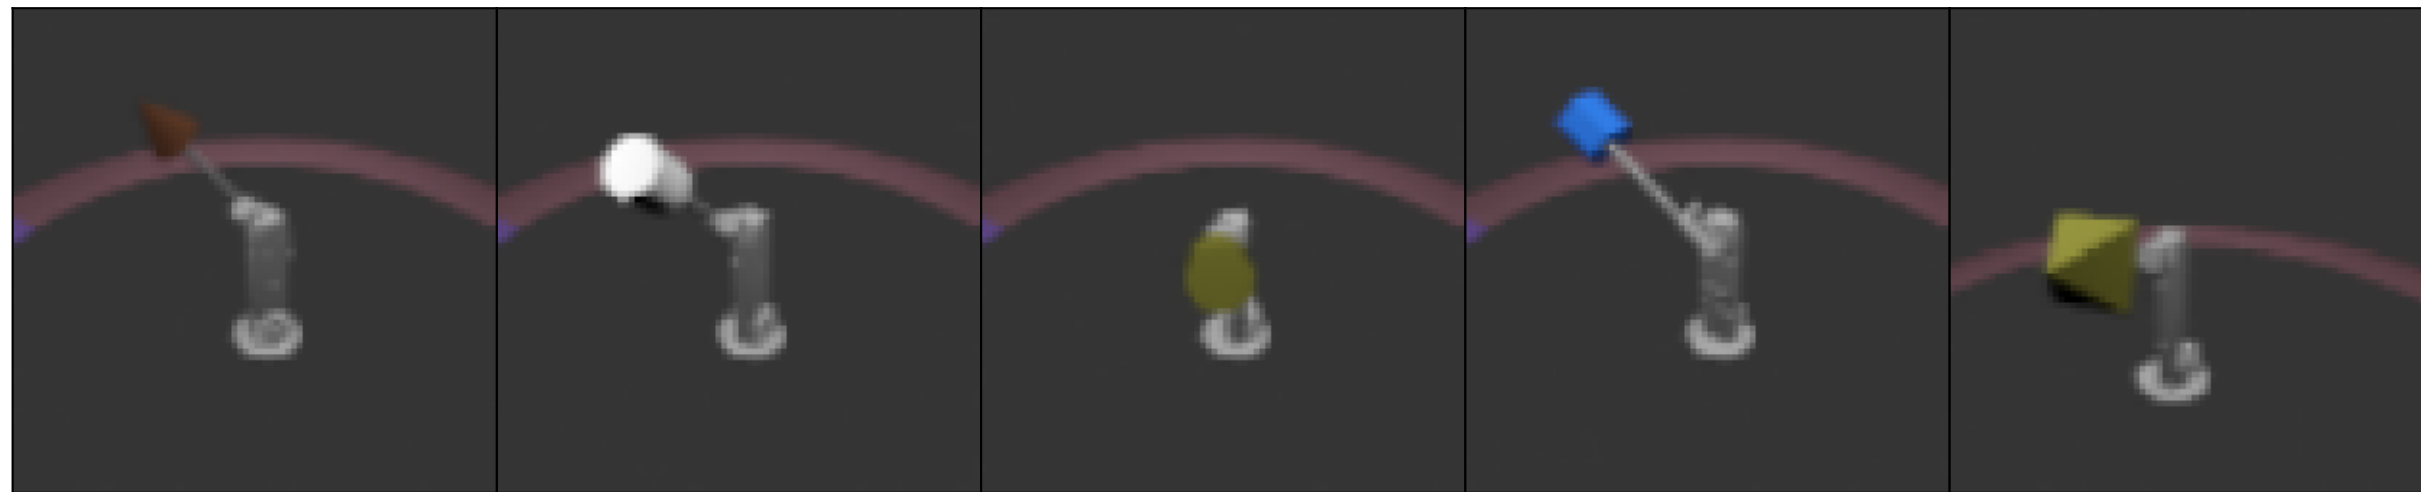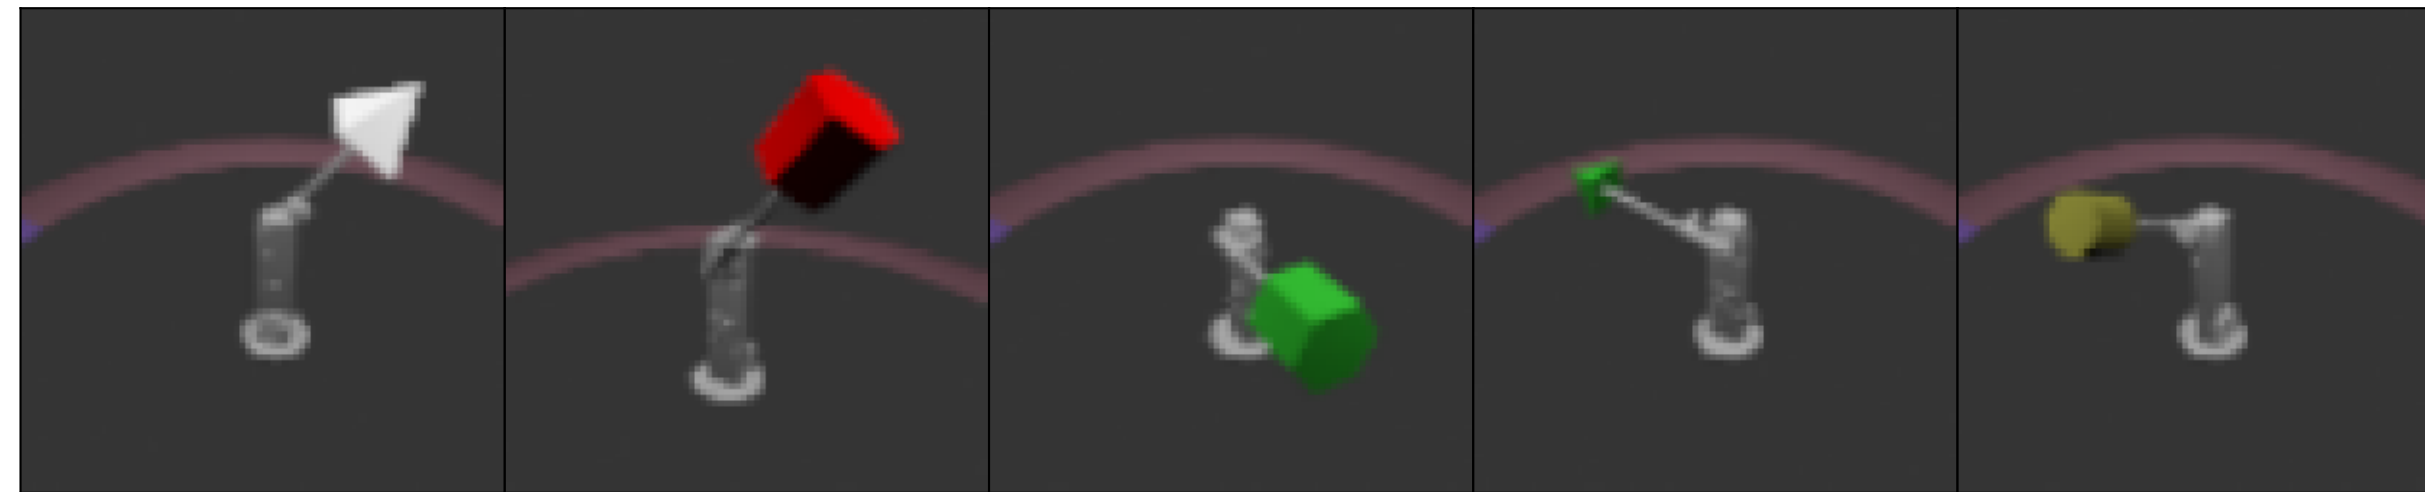

Class 1

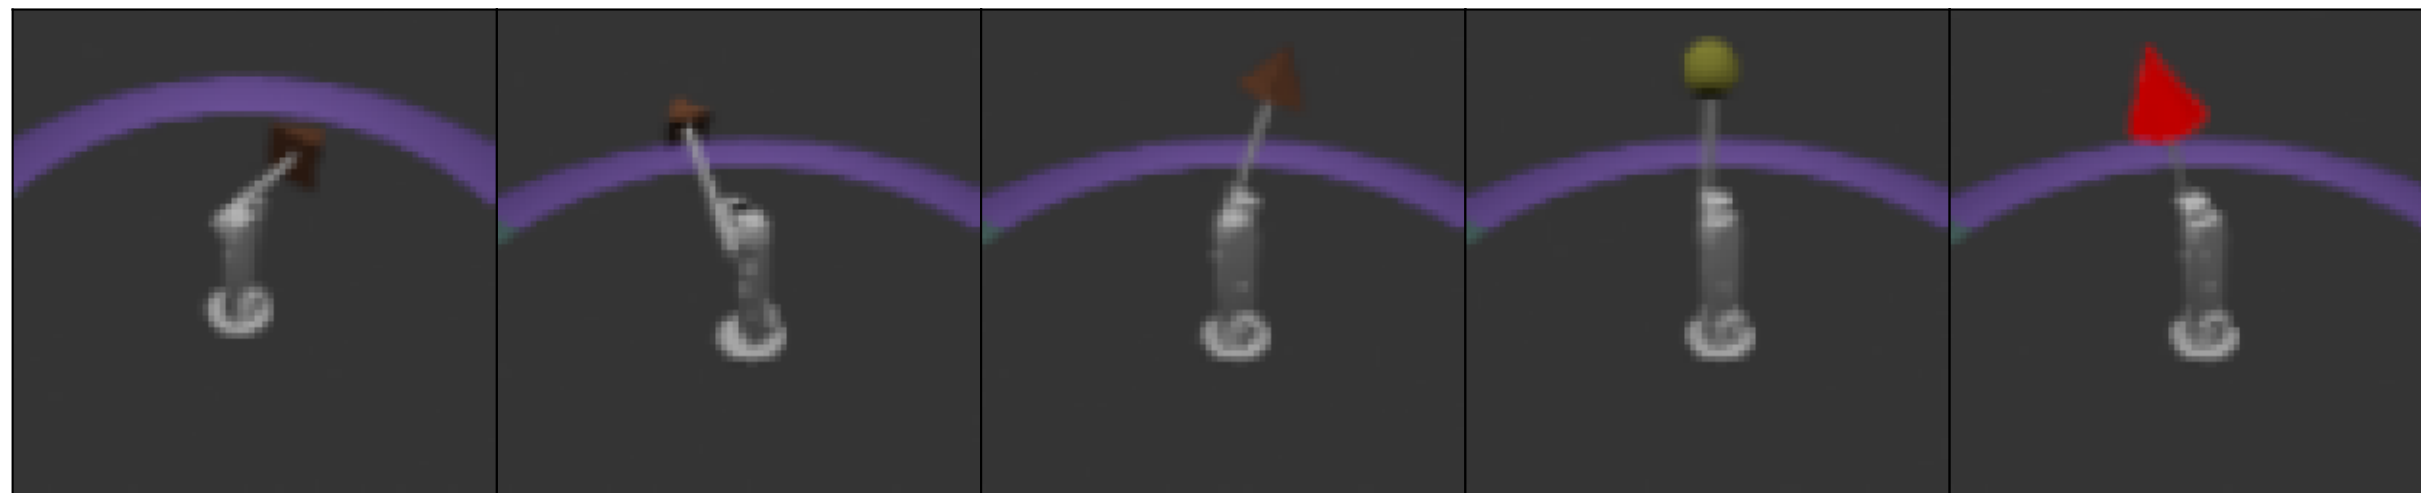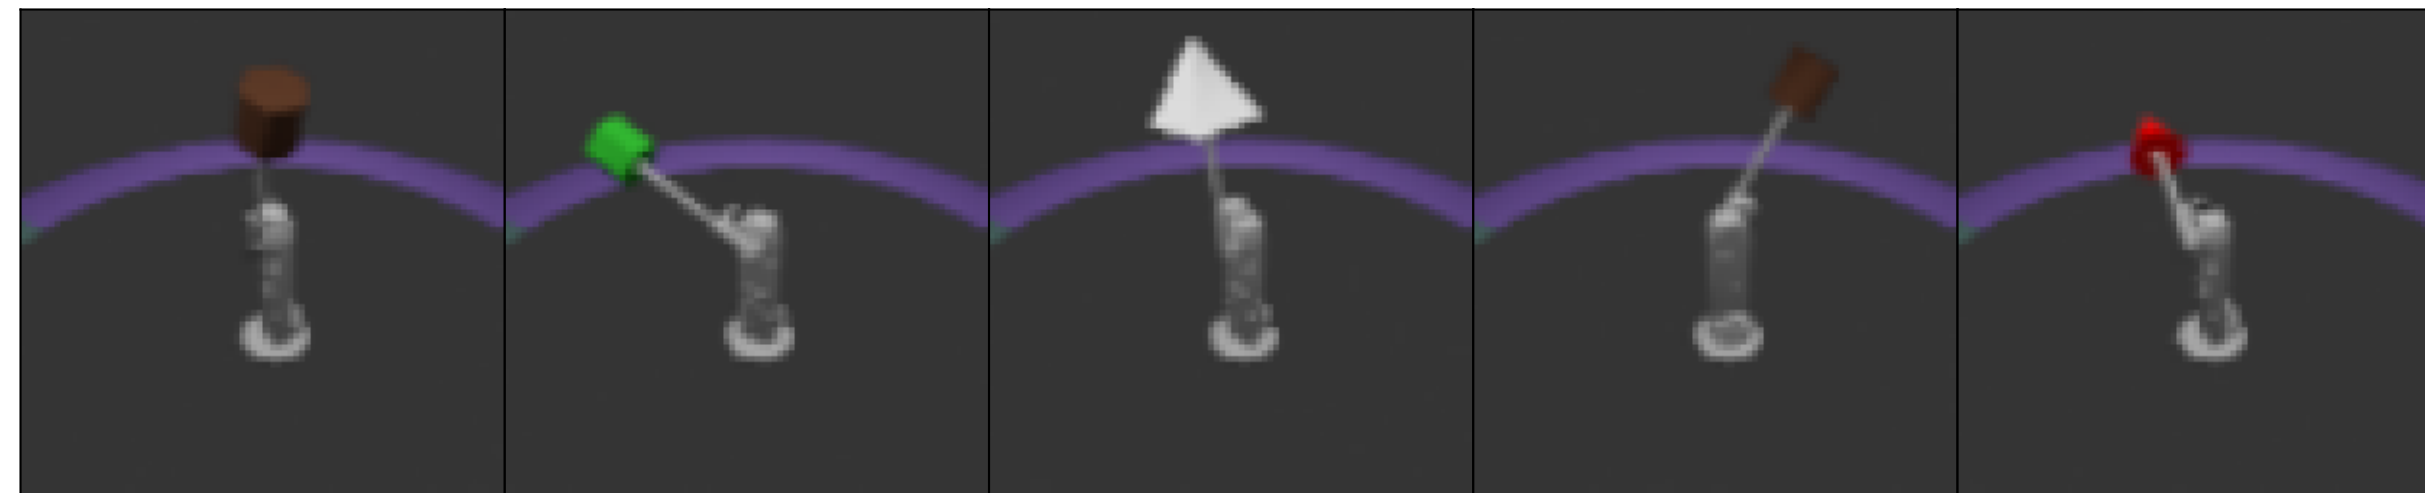

Support Samples

Query Samples

Supplement: supplementary_material [file mpi3d_fdae_bgcolor.pdf › DRESS_ICLR_Supplementary/DRESS_implementation_code/visualization_results/mpi3d_fdae_bgcolor.pdf]

Class 0

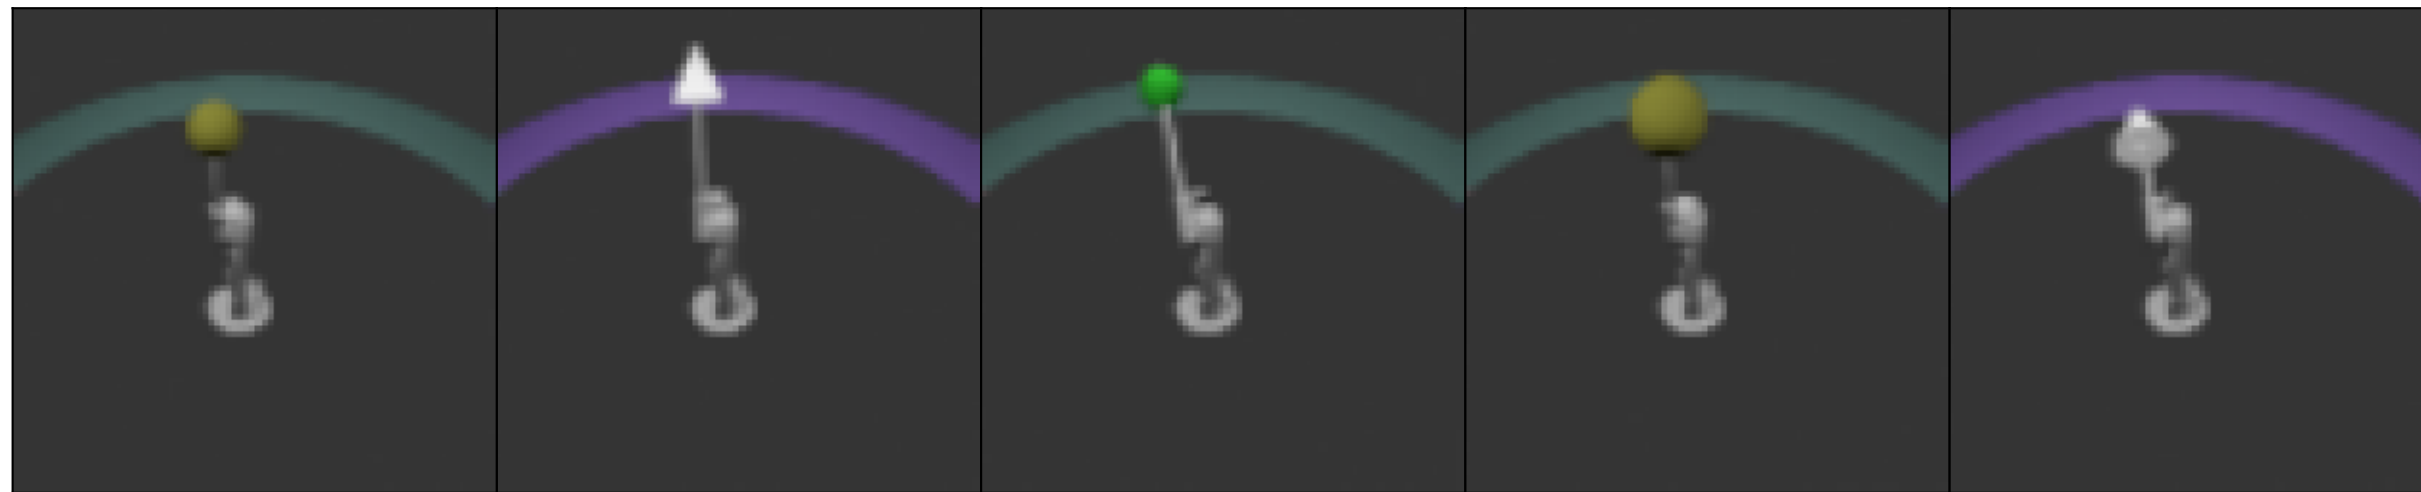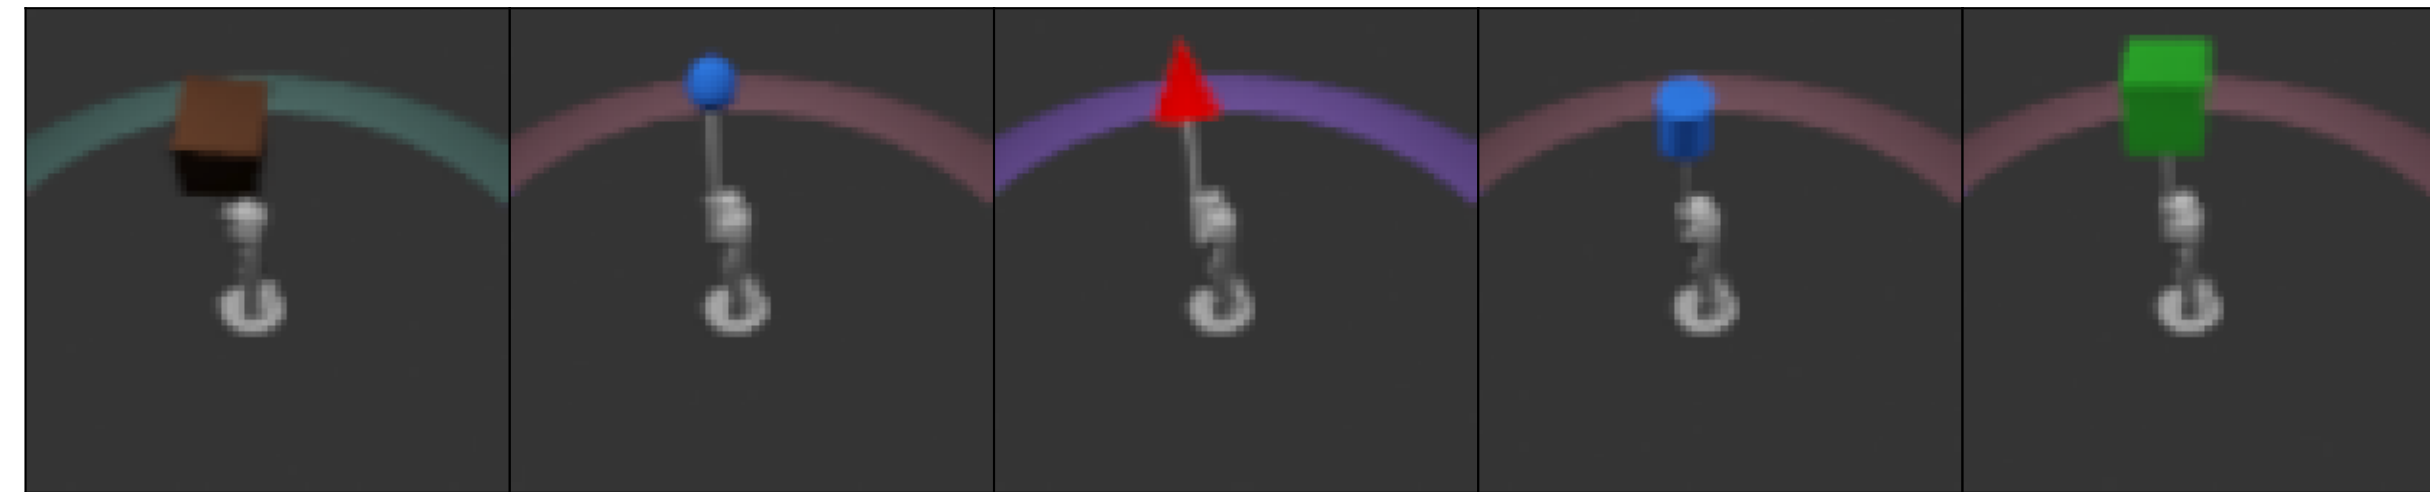

Class 1

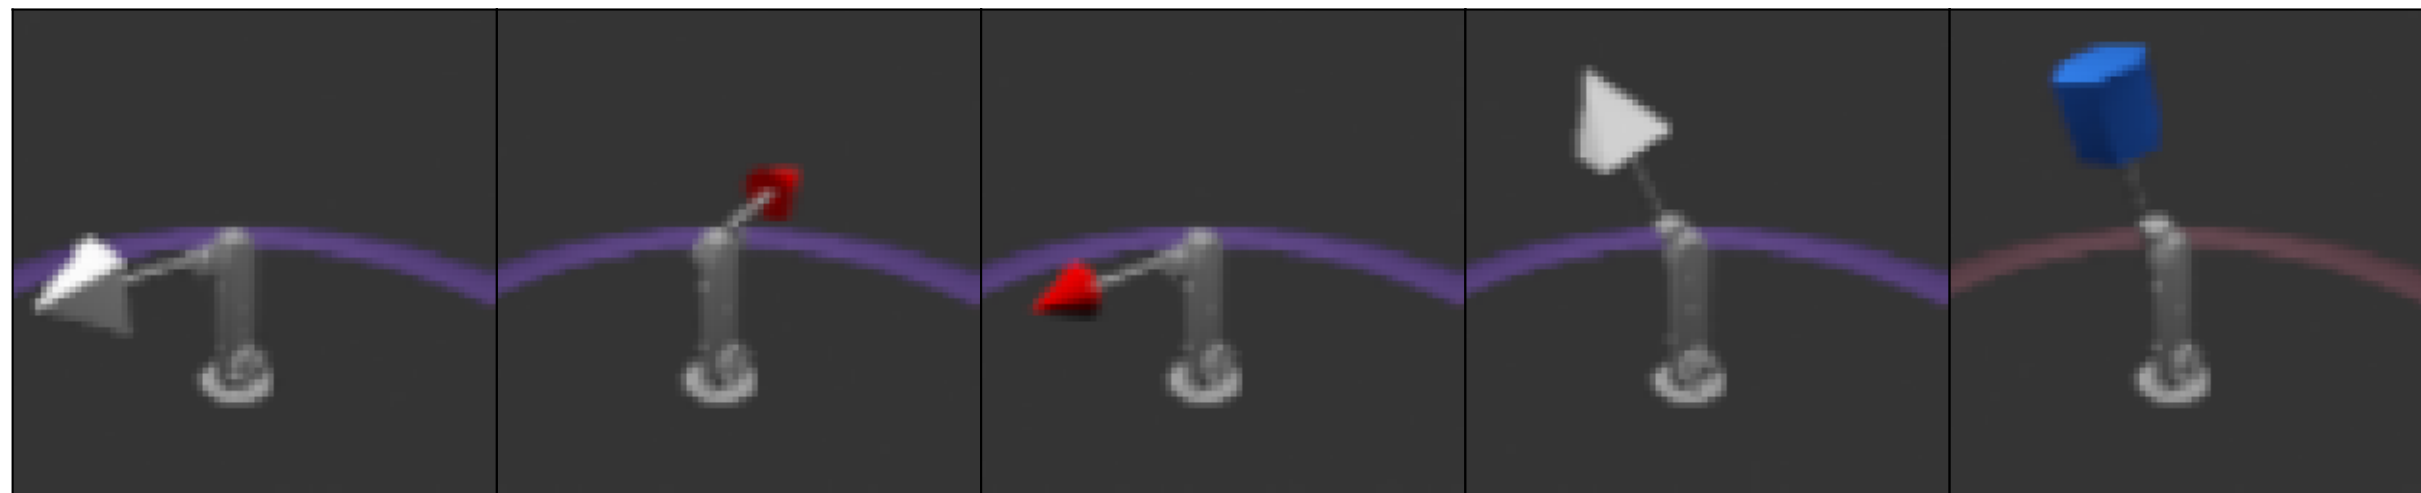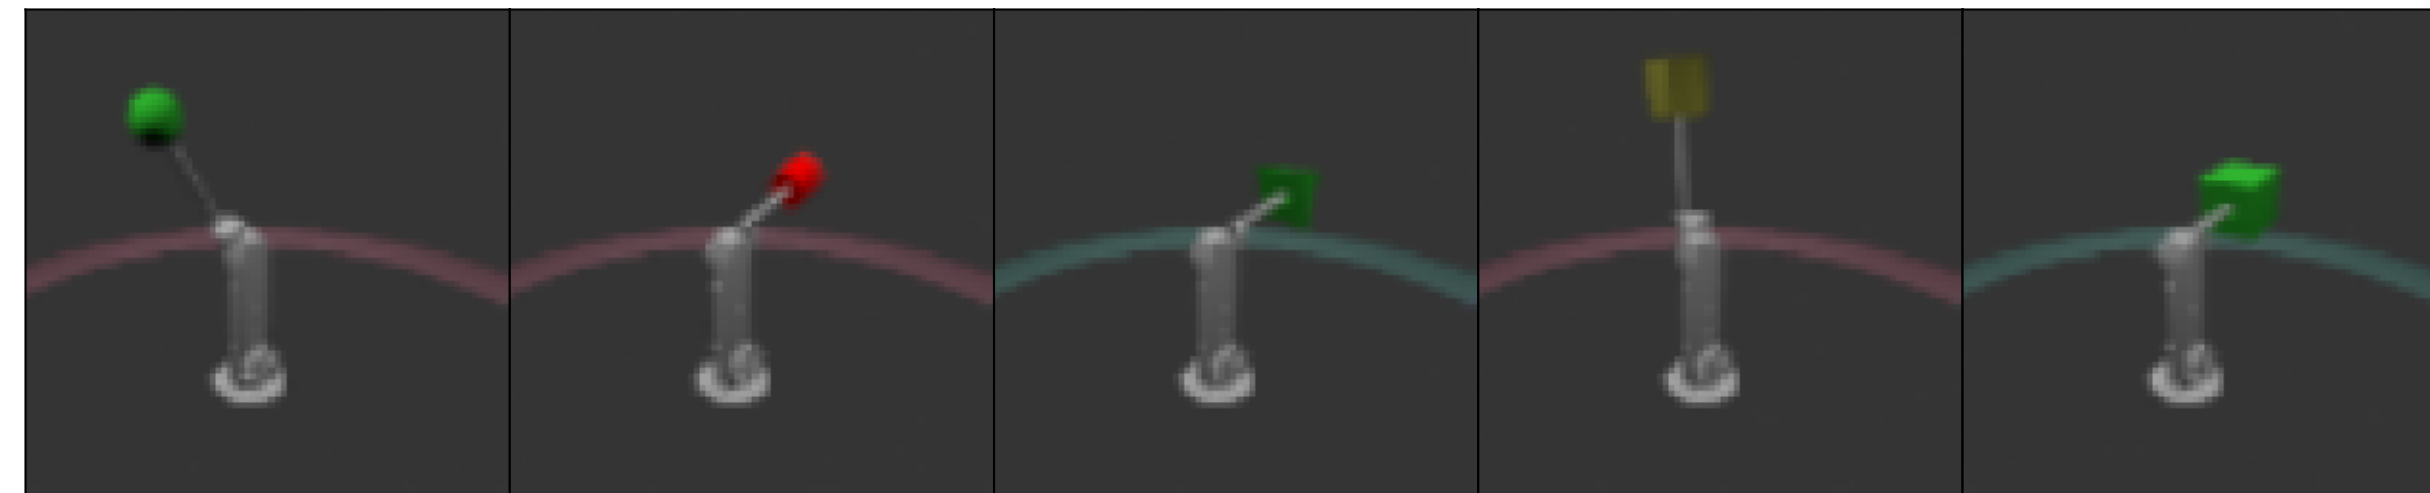

Support Samples

Query Samples

Supplement: supplementary_material [file mpi3d_fdae_camheight.pdf › DRESS_ICLR_Supplementary/DRESS_implementation_code/visualization_results/mpi3d_fdae_camheight.pdf]

Class 0

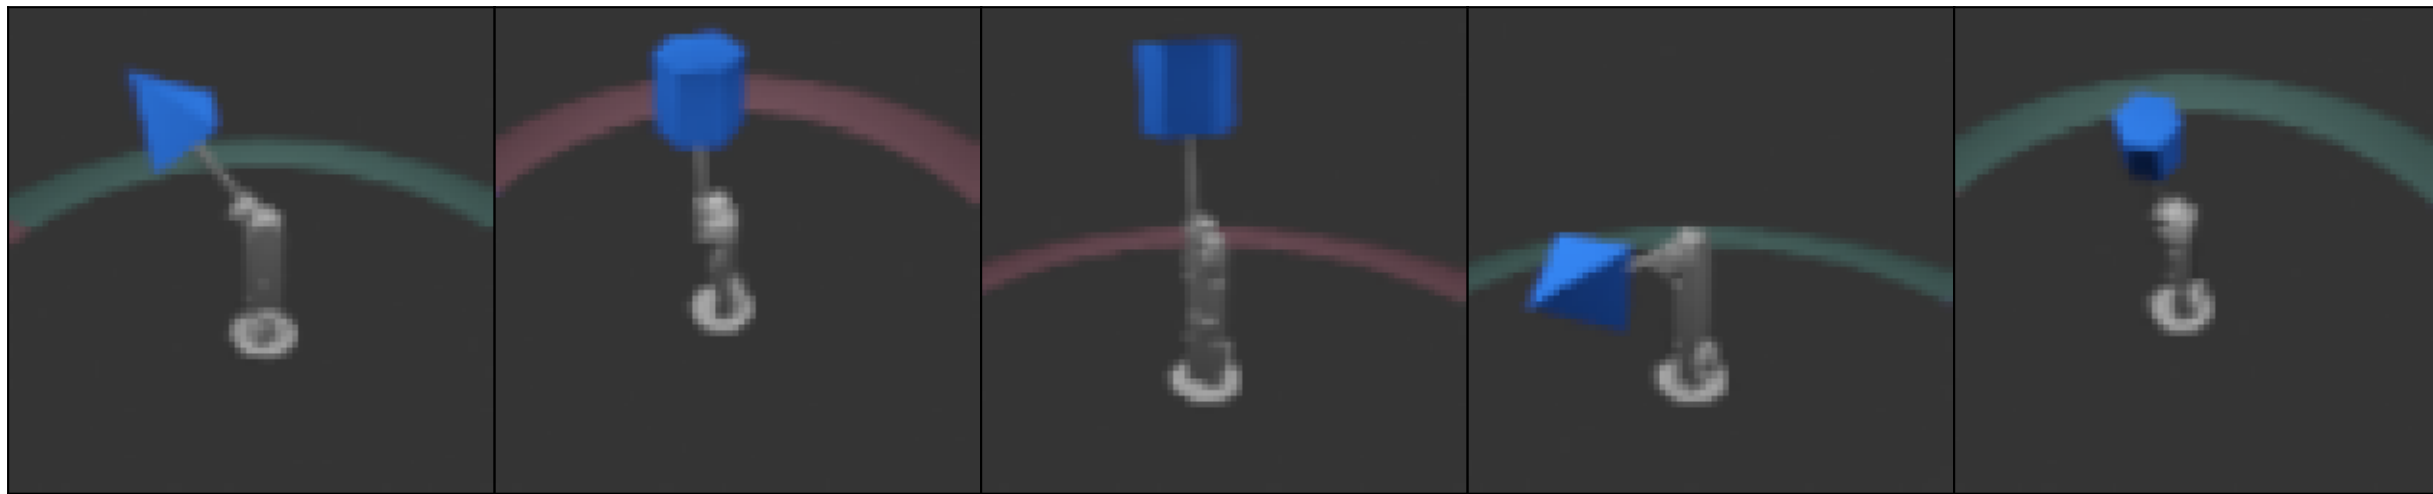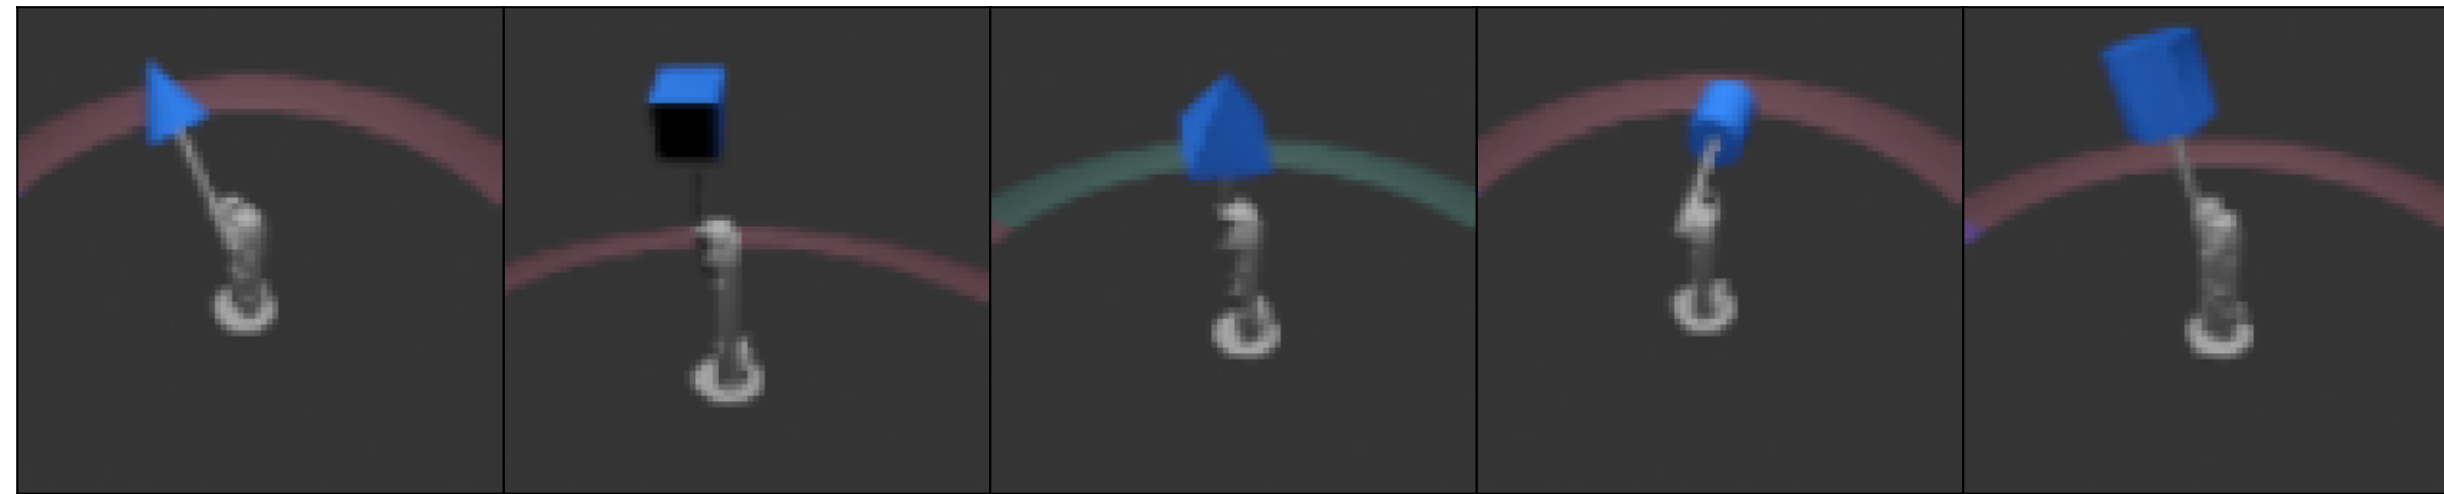

Class 1

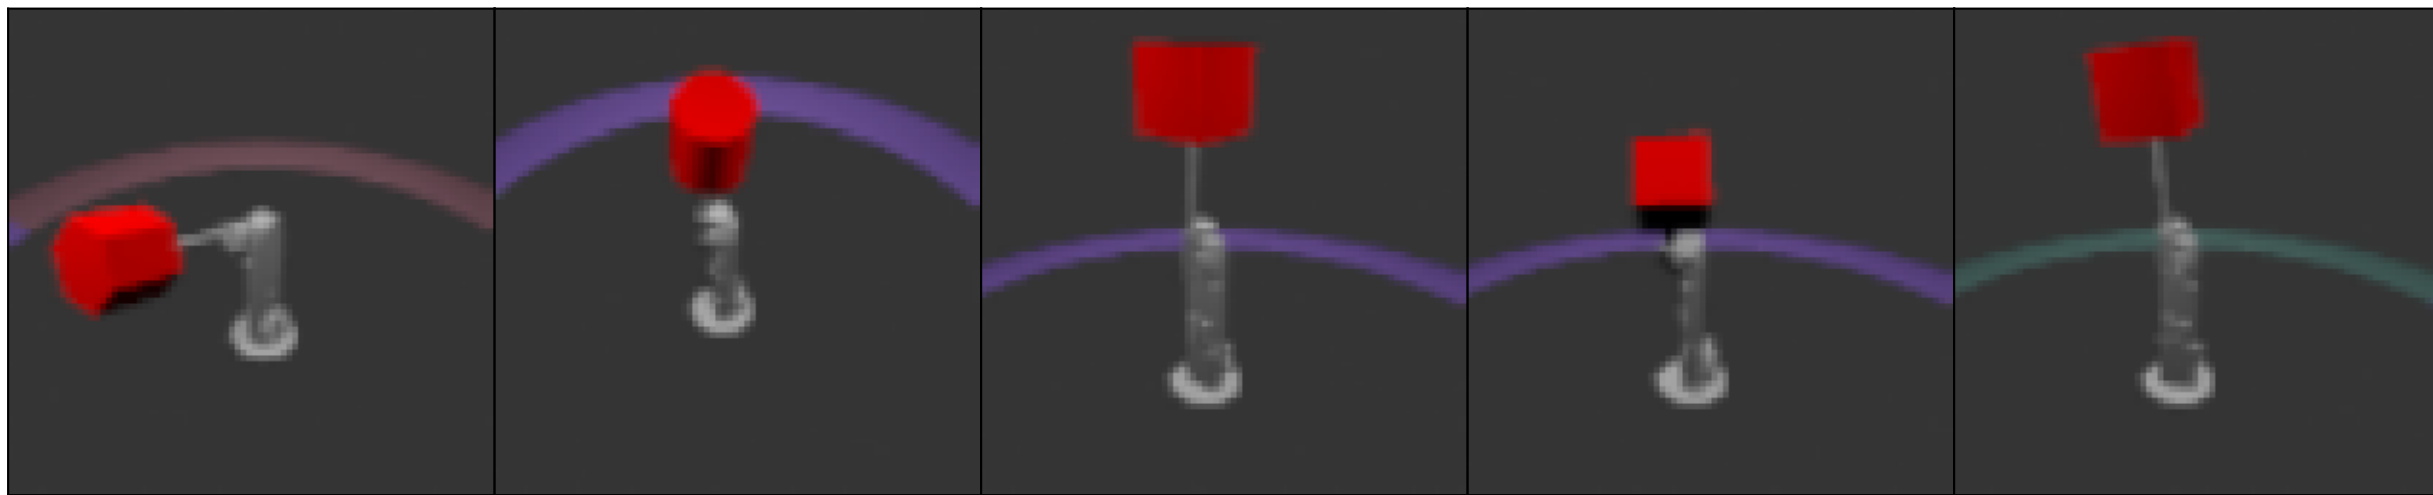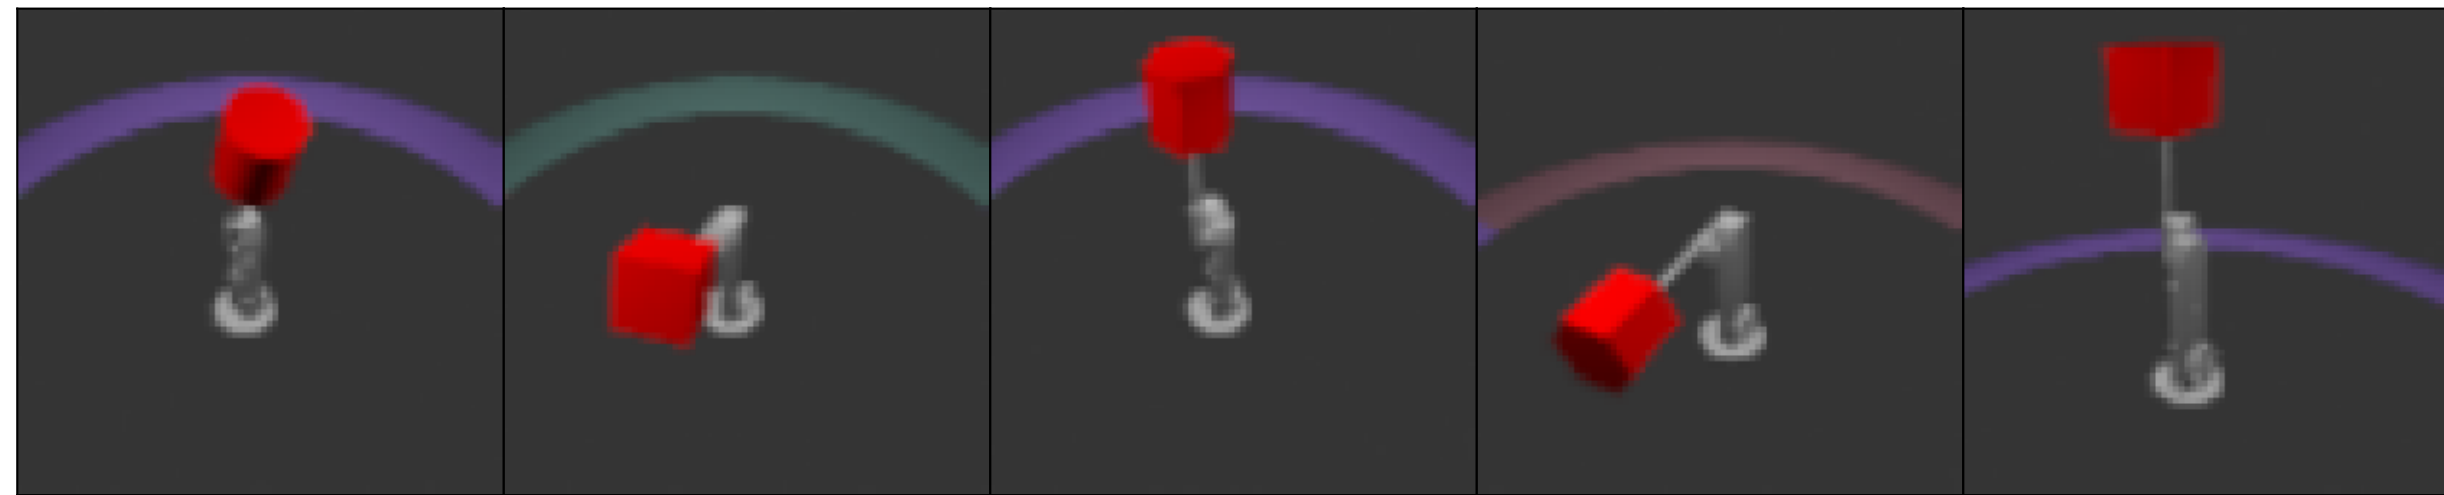

Support Samples

Query Samples

Supplement: supplementary_material [file mpi3d_fdae_objcolor.pdf › DRESS_ICLR_Supplementary/DRESS_implementation_code/visualization_results/mpi3d_fdae_objcolor.pdf]

Class 0

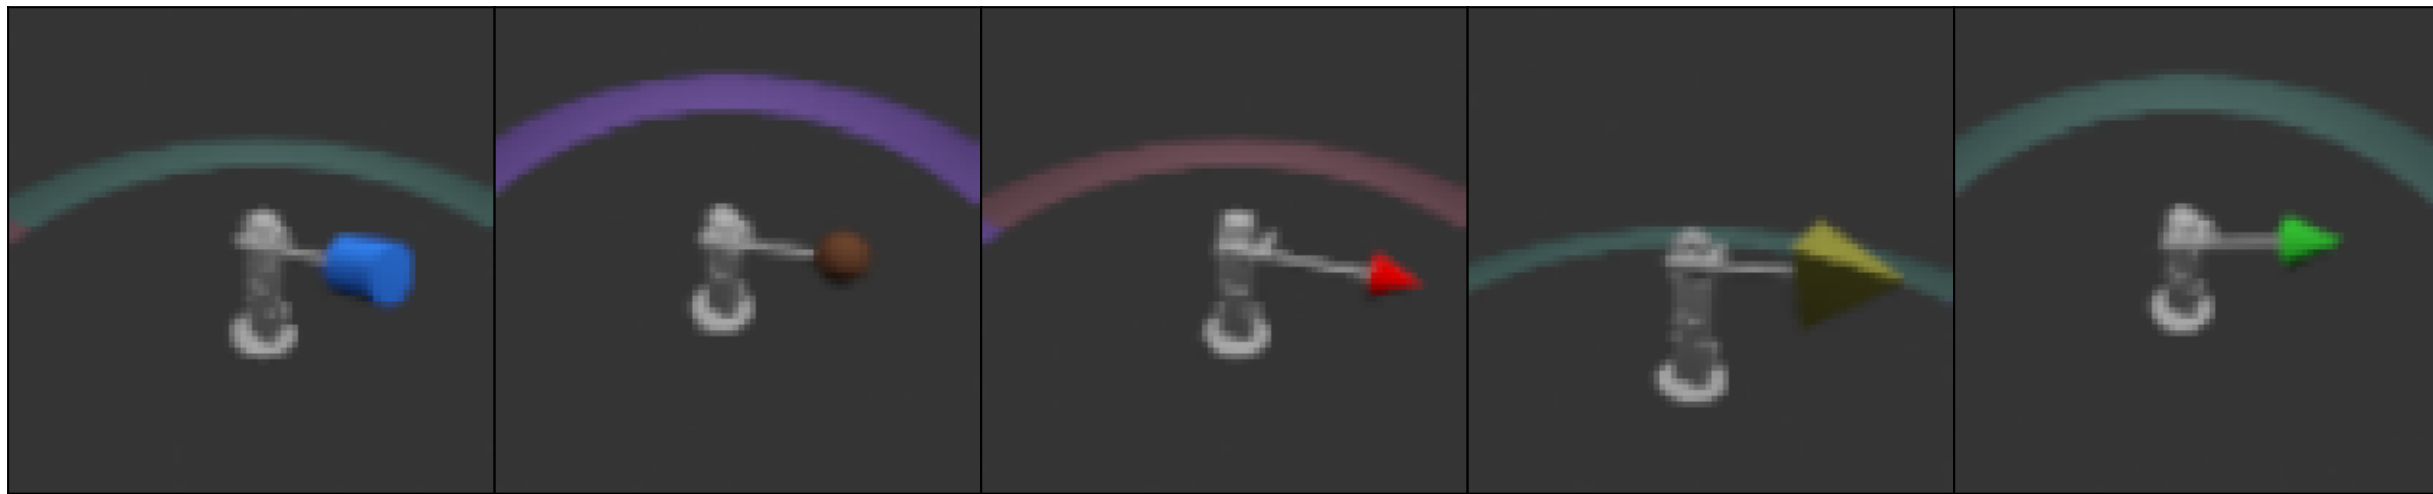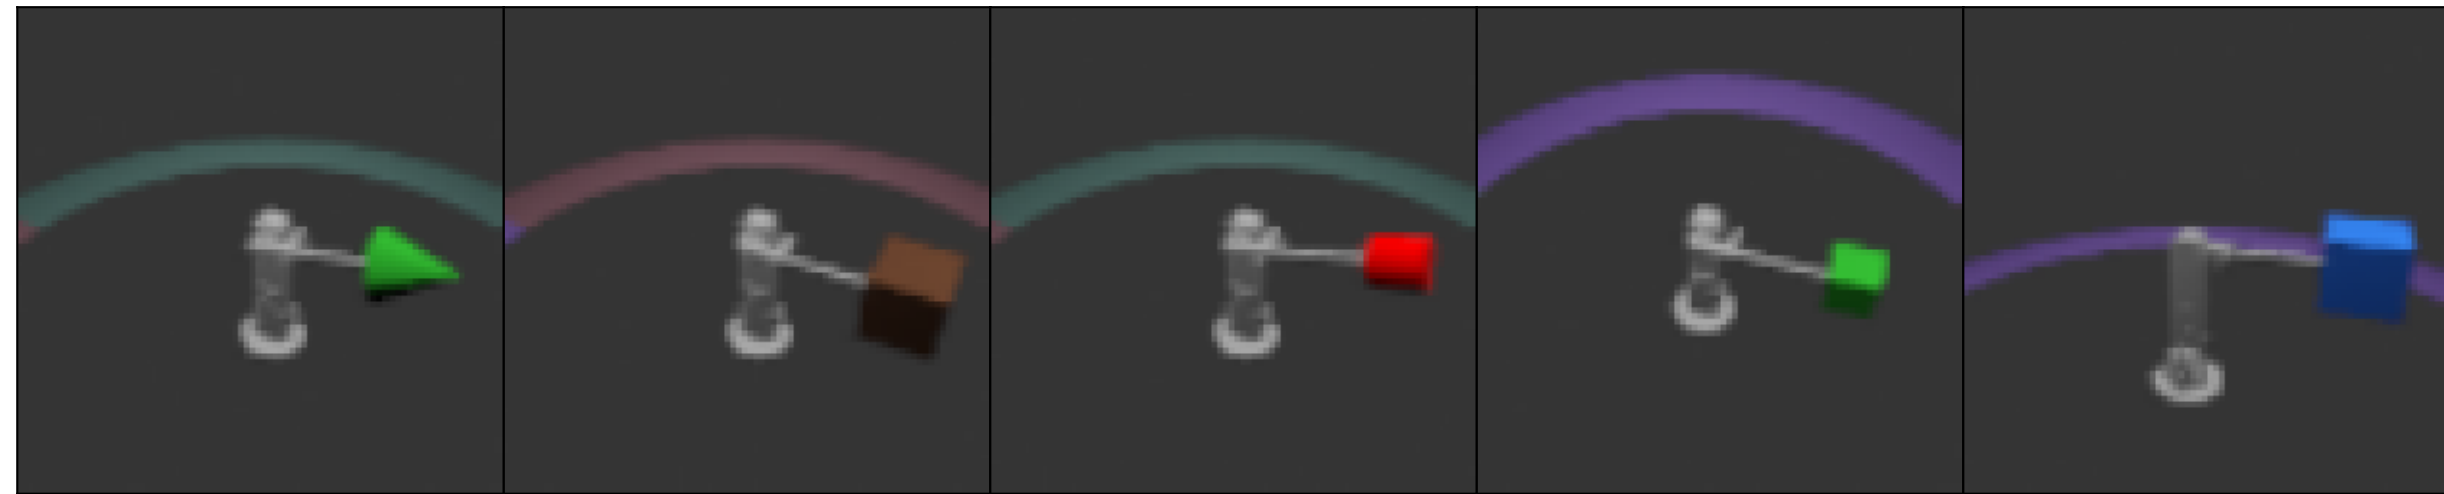

Class 1

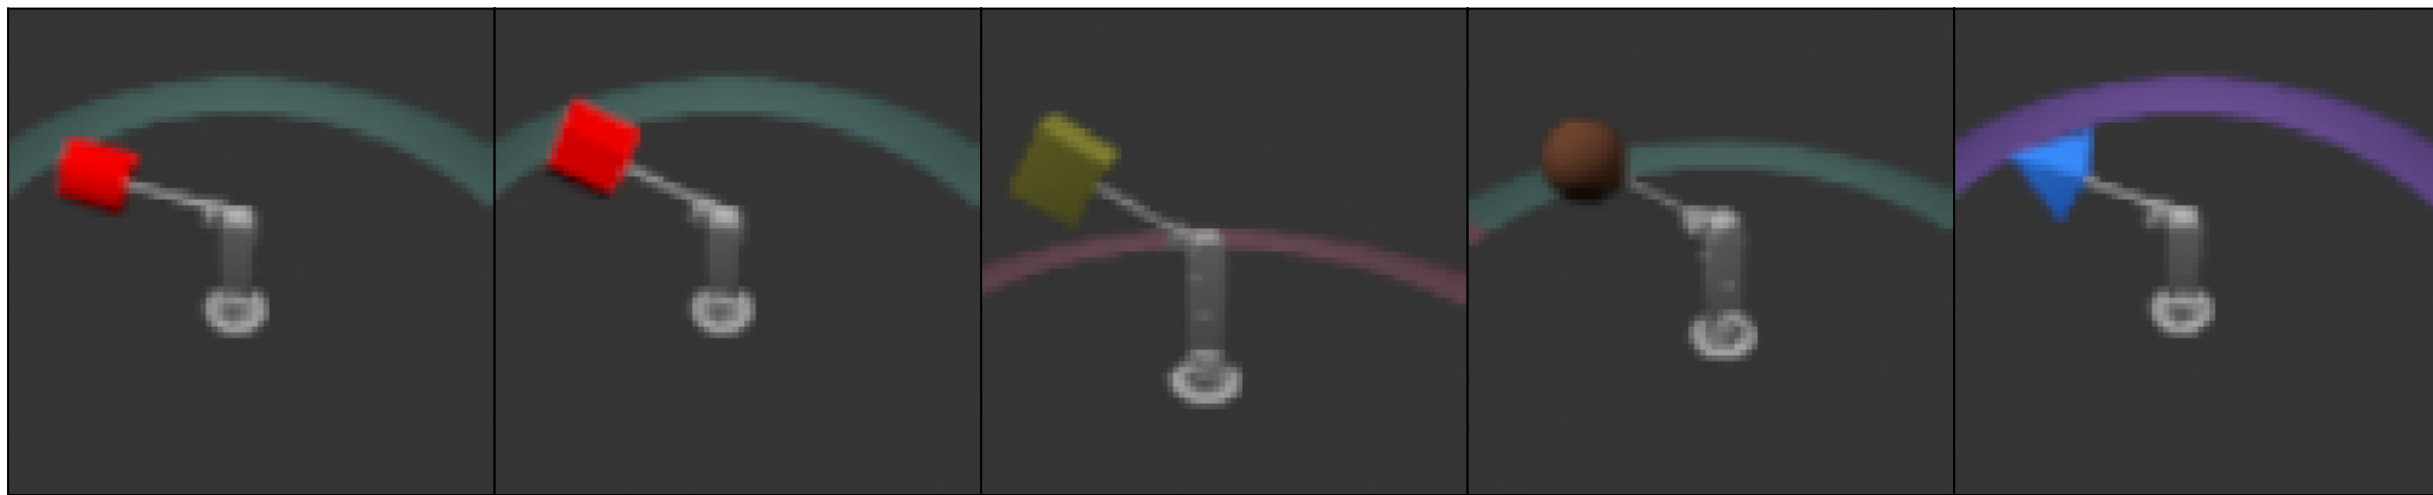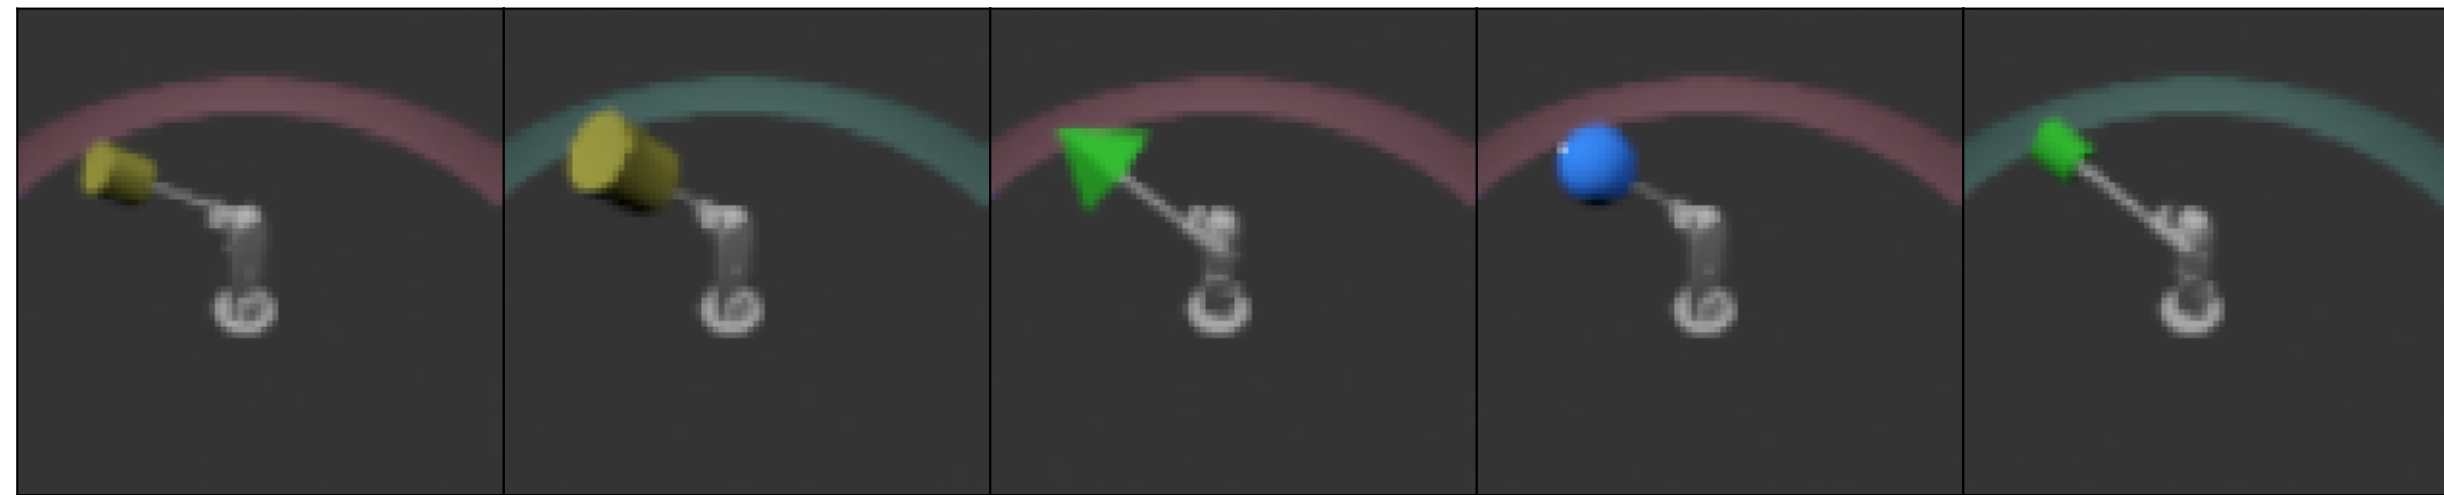

Support Samples

Query Samples

Supplement: supplementary_material [file mpi3d_fdae_robotarm.pdf › DRESS_ICLR_Supplementary/DRESS_implementation_code/visualization_results/mpi3d_fdae_robotarm.pdf]
